# 1 Cell Cycle Control by Nuclear Sequestration of *CDC20* and *CDH1* mRNA in Plant Stem 2 Cells

3 Weibing Yang<sup>1</sup>, Raymond Wightman<sup>1</sup>, and Elliot M. Meyerowitz<sup>1,2\*</sup>

4 <sup>1</sup>Sainsbury Laboratory, University of Cambridge, Bateman Street, Cambridge, CB2 1LR, UK

5 <sup>2</sup>Howard Hughes Medical Institute and Division of Biology and Biological Engineering,  
6 California Institute of Technology, 1200 East California Boulevard, Pasadena, CA 91125, USA

7 \*Correspondence: [meyerow@caltech.edu](mailto:meyerow@caltech.edu) (E.M.M.)

8

## 9 Abstract

10 In eukaryotic cells, most RNA molecules are exported into the cytoplasm after being  
11 transcribed in the nucleus. Long noncoding RNAs (lncRNAs) have been found to reside and  
12 function primarily inside the nucleus, but nuclear localization of protein-coding messenger  
13 RNAs (mRNAs) has been considered rare in both animals and plants. Here we show that two  
14 mRNAs, transcribed from the *CDC20* and *CCS52B* (plant orthologue of *CDH1*) genes, are  
15 specifically sequestered inside the nucleus during the cell cycle. *CDC20* and *CDH1* both  
16 function as coactivators of the anaphase-promoting complex or cyclosome (APC/C) E3 ligase  
17 to trigger cyclin B (*CYCB*) destruction. In the *Arabidopsis thaliana* shoot apical meristem  
18 (SAM), we find *CDC20* and *CCS52B* are co-expressed with *CYCBs* in mitotic cells. *CYCB*  
19 transcripts can be exported and translated, whereas *CDC20* and *CCS52B* mRNAs are strictly  
20 confined to the nucleus at prophase and the cognate proteins are not translated until the  
21 redistribution of the mRNAs to the cytoplasm after nuclear envelope breakdown (NEBD) at  
22 prometaphase. The 5' untranslated region (UTR) is necessary and sufficient for *CDC20* mRNA  
23 nuclear localization as well as protein translation. Mitotic enrichment of *CDC20* and *CCS52B*  
24 transcripts enables the timely and rapid activation of APC/C, while their nuclear sequestration  
25 at prophase appears to protect cyclins from precocious degradation.

26

## 27 Introduction

28 Understanding the patterns and regulatory mechanisms of organ formation in multicellular  
29 organisms is a central aspect of developmental biology (Lander, 2011). Animal organogenesis  
30 is completed during embryonic development or, in some instances, during metamorphosis;

31 while in plants, active division and differentiation of stem cells and their progenitors in the  
32 shoot apical meristem (SAM) and the root apical meristem (RAM) lead to continuous  
33 formation of new tissues and organs, ensuring developmental plasticity in a changing  
34 environment (Gaillochet and Lohmann, 2015; Heidstra and Sabatini, 2014; Meyerowitz, 1997;  
35 Vernoux et al., 2000). Plant cell division, as in mammalian cells, yeast and *Drosophila*, is  
36 triggered and maintained by the kinase complex composed of cyclin-dependent kinases (CDKs)  
37 and various cyclin subunits. Fluctuating gene expression and orderly proteolysis of cyclins,  
38 spatial positive feedback of Cdk1-cyclin B1 redistribution, combined with the antagonistic  
39 actions of Wee1 kinase and Cdc25 phosphatase, generate a robust and highly ordered mitotic  
40 process (Coudreuse and Nurse, 2010; Dewitte and Murray, 2003; De Veylder et al., 2007;  
41 Morgan, 1995; Santos et al., 2012).

42 Destruction of cyclins at the appropriate time in the cell cycle is mediated by APC/C, an E3  
43 ubiquitin ligase whose catalytic activity and substrate specificity are conferred by two  
44 coactivators, CDC20 and Cdc20 homolog 1 (CDH1) (Peters, 2006; Pines, 2011; Yu, 2007).  
45 During early mitosis, phosphorylation of the APC/C subunits, such as the auto-inhibitory  
46 segment loop in APC1, exposes the binding sites of CDC20 thus facilitating CDC20  
47 association with APC/C (Fujimitsu et al., 2016; Kraft et al., 2003; Qiao et al., 2016; Zhang et  
48 al., 2016). At prometaphase, APC/C activity is restrained by the spindle assembly checkpoint  
49 (SAC), a regulatory pathway during which unattached kinetochores generate a diffusible ‘wait  
50 anaphase’ signal that triggers the incorporation of CDC20 into a complex composed of MAD2,  
51 BUBR1 and BUB3, leading to the formation of the mitotic checkpoint complex (MCC)  
52 (Fraschini et al., 2001; Hardwick et al., 2000; Sudakin et al., 2001). Recently it has been  
53 proposed that MCC itself could function as a diffusible signal to inhibit APC/C by recognizing  
54 a second CDC20 that has already bound to and activated APC/C (Izawa and Pines, 2015).  
55 Furthermore, APC/C activity is counteracted by the F box protein early mitotic inhibitor 1  
56 (Emi1) (Reimann et al., 2001). The multi-faceted regulation of APC/C in various organisms  
57 suggests high plasticity of APC/C activity, and also implies the existence of additional  
58 mechanisms.

59 Subcellular RNA localization has been implicated in multiple cellular processes by  
60 regulation of spatial gene expression (Lipshitz and Smibert, 2000). For instance, the posterior-  
61 anterior polar localization of *bicoid*, *oskar*, *gurken*, and *nanos* mRNAs in *Drosophila* oocytes  
62 guides proper pattern formation and embryo development (Martin and Ephrussi, 2009). Long  
63 noncoding RNAs (lncRNAs) predominantly localize to the nucleus to modulate transcription

64 factor binding, histone modification, chromosome structures and specific nuclear body  
65 formation (Batista and Chang, 2013; Engreitz et al, 2016; Geisler and Collier, 2013; Tsai et al.,  
66 2010). While mature mRNAs are considered to reside predominantly in the cytoplasm, deep  
67 sequencing of nuclear and cytoplasmic RNA fractions from various mouse tissues identified a  
68 number of mRNAs with higher amounts in the nucleus than in the cytoplasm (Bahar Halpern  
69 et al., 2015), suggesting a potential for mRNA nuclear retention in gene expression regulation.  
70 However, nuclear localization of mRNAs or mRNA precursors and its biological relevance  
71 have rarely been documented. In *Drosophila* embryos, the non-polyadenylated *histone* mRNAs  
72 are retained in the nuclei of DNA-damaged cells, contributing to the maintenance of genome  
73 integrity (Iampietro et al., 2014). *CTN-RNA*, an adenosine-to-inosine (A-to-I) edited mouse-  
74 specific pre-mRNA, localizes in the nuclear paraspeckle and can be rapidly cleaved under  
75 physiologic stress to produce *mCAT2* mRNA encoding a cell-surface L-arginine receptor  
76 (Prasanth et al, 2005). Apart from these examples, nuclear sequestration of non-edited mature  
77 mRNAs remains to be discovered.

78 Here, through a comprehensive fluorescent in situ hybridisation (FISH) analysis of mRNA  
79 distribution of core cell cycle genes in *Arabidopsis* stem cells, we have found that *CDC20* and  
80 *CDH1* orthologue *CCS52B* mRNAs are sequestered in the nucleus during prophase. We show  
81 that *CDC20* and *CCS52B* transcripts accumulate to peak levels but are confined to the nucleus  
82 at prophase, and redistribute into the cytoplasm following NEBD at prometaphase. With  
83 fluorescence live cell imaging, we demonstrate that this mRNA nuclear sequestration blocks  
84 *CDC20* and *CCS52B* protein translation, thus preventing premature APC/C activation in early  
85 mitosis. By systematic mRNA deletion and chimeric RNA localization analysis, we found that  
86 *CDC20* mRNA 5'UTR confers nuclear sequestration and is also involved in protein translation.  
87 Nuclear sequestration of *CDC20* and *CCS52B* mRNAs reveals a previously unrecognized  
88 mechanism for the tuning of APC/C activity.

89

## 90 **Results**

### 91 **Systematic Analysis of mRNA Localization of Core Cell Cycle Genes in Meristematic** 92 **Cells**

93 In *Arabidopsis*, the SAM is organized into three zones distinguished by cell division activity:  
94 the central zone (CZ) composed of slowly dividing stem cells, which is surrounded by the  
95 peripheral zone (PZ) that contains rapidly dividing cells that give rise to primordia of leaves

96 and flowers, and the rib meristem (RM) underlying the CZ and the PZ responsible for stem  
97 growth (Steeves and Sussex, 1989) (Figure 1A). The distinct cell division activities in different  
98 SAM regions can be visualized by using a fusion of green fluorescent protein (GFP) to  
99 CyclinB1;1 (CYCB1;1-GFP), exhibiting a low number of GFP-positive cells in the slowly  
100 dividing cells of the CZ and RM, and relatively higher number in the PZ and flower primordia  
101 (Figure 1B). Using a GFP-microtubule-binding domain marker (GFP-MBD) and the nuclear  
102 reporter histone H2B fused to red fluorescent protein (H2B-RFP), we found that the  
103 microtubule and nuclear structures corresponding to different cell cycle stages could all be  
104 identified in the SAM (Figure 1C). Therefore, the SAM serves as a suitable system with which  
105 to study the control of the cell cycle in plants.

106 CDKs, CYCs and other regulatory proteins constitute a group of core cell-cycle regulators.  
107 Multiple members in each CDK and cyclin subfamily exist in plants, suggesting a level of  
108 functional conservation but also specialized regulation of cell cycle progression in plants as  
109 compared to animals (Vandepoele et al., 2002) (Figure 1D). To explore the role of cell cycle  
110 regulatory genes in *Arabidopsis* SAM development, we first analysed their mRNA abundance  
111 from RNA-seq data of meristematic cells derived from dissection of enlarged *clavata3* (*clv3*)  
112 mutant SAM (Yang et al., 2016). We focused on 130 annotated core cell-cycle regulators  
113 (Menges et al., 2005; Van Leene et al., 2010), and identified 72 genes showing detectable  
114 expression in the SAM (TPM > 10; Table S1). To investigate their expression pattern *in planta*,  
115 we carried out systematic RNA *in situ* hybridization. Using RNA probes specific to individual  
116 SAM-expressed cell cycle genes, we were able to detect the distribution of transcripts from 66  
117 genes at single-cell resolution. In situ hybridization results are presented in Data S1. Most of  
118 the genes exhibited strong expression in the SAM compared to other tissues (e.g. stem),  
119 supporting the RNA-seq data. Based upon their expression patterns, these cell-cycle genes were  
120 classified into six groups: (i) homogeneous signal (Type I); (ii) homogeneous background  
121 signal with weak additional signal in a spotted pattern (Type II); (iii) homogeneous background  
122 signal with strong additional spots of signal (Type III); (iv) weak spots of signal in a subset of  
123 cells (Type IV); (v) only strong spots of signal in a subset of cells (Type V); and (vi)  
124 homogeneous background expression with additional strong signal in developing primordia  
125 (Type VI) (Figure 1E; Table S1). Homogeneous signals across the whole meristem indicate  
126 that the corresponding genes are expressed throughout the cell cycle; whereas patchy patterns  
127 suggest that expression correlates to specific cell cycle stages.

128 Most of the G1/S regulators, including *CDKA;1*, *E2Fs* (*E2Fa*, *E2Fb* and *E2Fc*) and *DPs*  
129 (*DPa* and *DPb*), displayed homogeneous expression in the shoot apex, which would maintain  
130 these meristematic cells with the capacity for active proliferation. One exception was  
131 *RETINOBLASTOMA RELATED (RBR)*, an inhibitor of E2F and DP transcription factors,  
132 which showed a strong patchy pattern (Type III) (Figure 1E), similar to previous observations  
133 in embryonic and root meristematic cells (Wildwater et al., 2005), and implying a cell-cycle  
134 controlled regulation. Compared to G1/S genes, G2/M regulators, including plant-specific B  
135 type CDKs (*CDKBs*), and A and B type cyclins (*CYCA*s and *CYCB*s) were all grouped into  
136 Type V, showing a strongly patchy pattern with weak background expression (Figure 1E).  
137 RNA fluorescence *in situ* hybridization (RNA FISH) together with 4', 6-diamidino-2-  
138 phenylindole (DAPI) staining indicated that these genes were exclusively expressed in mitotic  
139 cells from early prophase until late anaphase (Figure S1).

140 Our gene expression map data were consistent with Affymetrix microarray data of dividing  
141 *Arabidopsis* cell cultures (Menges et al., 2005). The mRNA distribution patterns in the shoot  
142 apex, combined with previous cell-cycle transcript *in situ* analysis in *Arabidopsis* seedlings and  
143 in the shoot/floral meristems of *Antirrhinum majus* (de Almeida Engler et al., 2009; Fobert et  
144 al., 1994), provide a good overview of cell cycle gene expression patterns in various plant  
145 tissues.

146

#### 147 **Mitosis-specific Expression of *CDC20* and *CCS52B* mRNA**

148 The accumulation of *CYCB* transcripts at M-phase (Figures S2A and S2B) would be expected  
149 to lead to a corresponding peak of *CYCB* proteins at this stage. Indeed, *CYCB1;1*-GFP  
150 fluorescence signals increased from prophase onwards, peaked at metaphase and then  
151 decreasing rapidly at anaphase, finally being undetectable in telophase cells (Figures S2C-S2E).  
152 The decline of *CYCB1;1*-GFP fluorescence signals could be caused by insufficient protein  
153 synthesis and/or short half-life. The rapid elimination of large amount of *CYCB1* proteins may  
154 attribute to APC/C-mediated degradation (Figure 2A), a mechanism conserved among various  
155 organisms. The genes encoding *Arabidopsis* APC/C subunits, as well as the *CDH1* orthologues  
156 *CCS52A1* and *CCS52A2*, were all expressed homogeneously in the SAM at relatively low level  
157 (Table S1 and Data S1). By contrast, both *CDC20* and *CCS52B* showed strong patchy patterns  
158 similar to *CYCB* genes (Data S1). The distinct expression patterns of A- and B-class *CCS52*  
159 genes supported the predicted roles of *CCS52As* in regulating endoreduplication (Cebolla et

160 al., 1999; Lammens et al., 2008; Vanstraelen et al., 2009), and *CCS52B* in controlling mitosis  
161 (Tarayre et al., 2004).

162 Cell-cycle controlled *CDC20* and *CCS52B* expression was further investigated by RNA  
163 FISH. Both mRNAs accumulated exclusively in mitotic cells from prophase until cytokinesis  
164 (Figures 2B-2E). The amount of *CDC20* mRNA decreased when mitosis was completed  
165 (Figure 2D), whereas a high level of *CCS52B* mRNA persisted until cytokinesis (Figure 2E).  
166 The extended expression of *CCS52B* relative to *CDC20* was validated by double RNA FISH.  
167 *CDC20* and *CCS52B* mRNAs co-expressed in early mitotic cells, but at late mitosis a  
168 population of cells were found only to express *CCS52B* (Figure S3). Taken together, the  
169 enrichment of *CDC20* and *CCS52B* transcripts, along with the constitutive expression of all  
170 APC/C components, would presumably allow for rapid APC/C activation.

171

### 172 ***CDC20* and *CCS52B* mRNAs Are Sequestered in the Nucleus at Prophase**

173 Mature mRNAs are usually rapidly exported out of the nucleus (Köhler and Hurt, 2007). For  
174 example, *CYCB* transcripts, despite their high levels, were all found to reside in the cytoplasmic  
175 space (Figures S1 and S2). However, when analysing the sub-cellular distribution of *CDC20*  
176 and *CCS52B* mRNAs in prophase cells, we found that each of them is localized inside the  
177 DAPI-labelled nuclei (Figure 2F). No hybridization signals could be detected in the cytoplasm  
178 even when we increased the detection settings to saturation (data not shown). To further  
179 validate the nuclear sequestration of *CDC20* and *CCS52B* transcripts, we examined *CDC20*  
180 and *CCS52B* mRNA localization in mitotic cells together with a marker for the nuclear  
181 envelope. *CDC20* and *CCS52B* mRNAs were detected by RNA FISH. The nuclear envelope  
182 was revealed by immunohistochemistry using an anti-GFP antibody in SAM sections of  
183 *Arabidopsis* nuclear envelope marker line SUN2-GFP (Oda and Fukuda, 2011; Varas et al,  
184 2015). As shown in Figures 2G and 2H, both *CDC20* and *CCS52B* mRNAs were localized  
185 inside the nucleus and were surrounded by the intact nuclear envelope in prophase cells; when  
186 cells enter metaphase and the nuclear envelope has disassembled, the transcripts were found  
187 distributed in the cytoplasm. At late telophase and cytokinesis when the nuclear envelope  
188 reforms, *CDC20* and *CCS52B* mRNAs were excluded from the nuclei of daughter cells,  
189 suggesting that once in the cytoplasm, *CDC20* and *CCS52B* mRNAs are not imported back or  
190 recruited into the nucleus. These cytosol-localized *CDC20* and *CCS52B* mRNAs seem to be  
191 unstable as they could only be detected in a small group of newly divided cells. Nuclear

192 localization of *CDC20* mRNA was also detected in root apical meristem (Figures S4A and S4B)  
193 and shoot vascular cambium (Figure S4C), demonstrating that this phenomenon exists in the  
194 dividing cells of different tissues.

195

### 196 **Nucleo-cytoplasmic Compartmentalization of *CDC20* and *CYCB* mRNAs**

197 Since both *CYCBs* and *CDC20* transcripts could be detected at prophase, we hypothesized that  
198 they might be expressed simultaneously in the same cells, although the possibility of sequential  
199 expression could not be excluded. To clarify this, we investigated *CYCBs* and *CDC20*  
200 expression in the same meristems by double RNA FISH. *Arabidopsis* wild-type meristems  
201 were hybridised with both *CYCBs* and *CDC20* gene-specific RNA probes and the number of  
202 cells expressing different genes was quantified. *CDC20* was found to largely co-express with  
203 different *CYCB* genes in all mitotic cells from prophase until anaphase (Figures 3A and 3C),  
204 whereas no co-expression was detected for *CDC20* with the S phase marker *Histone H4 (HIS4)*  
205 gene (Figure 3B). In prophase cells, the localization of *CDC20* and *CYCB* transcripts was  
206 clearly separated: *CDC20* mRNA was restricted to the nuclei and surrounded by  
207 cytoplasmically localized *CYCB* mRNAs (Figures 3A and S5). Therefore, *CYCB* mRNAs can  
208 be translated, resulting in high expression of CYCB1;1-GFP in prophase cells (Figure S2);  
209 whereas nuclear confinement of *CDC20* and *CCS52B* transcripts might prevent protein  
210 synthesis.

211

### 212 **Nuclear Sequestration of *CDC20* and *CCS52B* mRNAs Blocks Protein Translation**

213 To evaluate the effect of *CDC20* and *CCS52B* mRNA nuclear sequestration upon protein  
214 translation, we analysed the expression patterns of GFP-tagged *CDC20* and *CCS52B* fusion  
215 proteins in living cells, an approach that has been widely used to track the dynamics of key cell  
216 cycle proteins, including *CDC20* in animal cells (Nilsson et al., 2008). Genomic fragments  
217 containing the entire coding sequences of *CDC20* and *CCS52B* were fused with *GFP* at the N-  
218 terminus and expressed in wild-type plants under the control of their endogenous promoters.  
219 Double RNA FISH using *GFP* probe and *CDC20* and *CCS52B* gene-specific probes showed  
220 overlapping signals at different mitotic stages, suggesting that fusion of *GFP* coding sequence  
221 did not interfere with nuclear localization of *CDC20* or *CCS52B* mRNAs (Figure S6).

222 The meristems of *pCDC20::GFP-gCDC20* and *pCCS52B::GFP-gCCS52B* transgenic  
223 plants were examined using confocal microscopy. GFP-CDC20 was only expressed in a small  
224 fraction of meristematic cells (Figure 4A). GFP-CCS52B protein expression could be identified  
225 in a greater proportion of SAM cells, which predominantly localized in the nucleus but also in  
226 the cytoplasm (Figure 4C). For both proteins, the expression levels varied between different  
227 cells (Figures 4B and 4D). To analyse their expression in relation to different phases of the cell  
228 cycle, we further introduced GFP-CDC20 and GFP-CCS52B into H2B-RFP plants. GFP-  
229 CDC20 fluorescence signals were detected at very low level in prometaphase cells, increased  
230 slowly at metaphase and anaphase, and reached maximal level in late telophase cells. When  
231 cytokinesis was completed, GFP-CDC20 eventually decreased and disappeared (Figures 4E  
232 and 4F). Compared to GFP-CDC20, the expression of GFP-CCS52B was much delayed, as it  
233 was not detected until cells enter late telophase. GFP-CCS52B protein expression exhibited its  
234 peak level at cytokinesis, and persisted until the next G1 stage (Figures 4G and 4H).

235 The protein expression pattern of CDC20 beginning at prometaphase was consistent with its  
236 transcript accumulation prior to NEBD, followed by mRNA redistribution into the cytoplasm  
237 after NEBD. However, given the late appearance of CCS52B protein despite much earlier  
238 release of its RNA from the nucleus, it appears that there are additional mechanisms beyond  
239 nuclear sequestration that controls CCS52B translation, one of which could be regulation by  
240 *CCS52B* mRNA binding proteins as RNA-binding proteins also play crucial roles in controlling  
241 translation efficiency besides guiding RNA localization (Lipshitz and Smibert, 2000).  
242 Nevertheless, the peak accumulation of CCS52B protein at cytokinesis and subsequent stages  
243 was in line with the predicted roles of Cdh1 to degrade CDC20 and maintain a low cyclin  
244 abundance through late mitosis and G1 phases (Fang et al., 1998). After analysing a number of  
245 meristems from different transgenic lines, we were unable to detect any GFP-CDC20 or GFP-  
246 CCS52B protein expression in prophase cells, demonstrating that mRNA nuclear sequestration  
247 correlated with an absence of protein translation.

248

### 249 **Dynamic Turnover of CDC20 and CCS52B proteins**

250 The GFP-CDC20 and GFP-CCS52B proteins dynamics was further examined by real-time  
251 fluorescence imaging of individual cells, revealing that both proteins accumulated rapidly at  
252 late mitosis and disappeared when mitosis was completed (Figures S7A and S7B). Fluctuation  
253 in CDC20 protein levels during the cell cycle has been observed in animal cells (Fang et al.,



1998; Kramer et al., 1998; Prinz et al. 1998). For CDH1, the protein level appears to remain constant throughout the cell cycle in HeLa cells (Fang et al., 1998; Kramer et al., 1998). In order to distinguish changes in gene expression from proteolytic activity, we treated SAMs with the proteasome inhibitor MG132. This treatment did not increase the protein level of GFP-CCS52B, suggesting that CCS52B levels are a function of gene expression and translation (Figure S7C). By contrast, MG132 treatment resulted in a marked increase in GFP-CDC20 fluorescence intensity in both SAM and root cells (Figures S7D and S7E), implying that CDC20 may undergo continuous synthesis and degradation. Therefore, a conserved surveillance system exists to tightly control CDC20 protein abundance in plants as in human cells (Ge et al., 2009; Izawa and Pines, 2015; Nilsson et al., 2008).

264

### 265 **Mapping the Cis-acting Element Involved in *CDC20* mRNA Nuclear Localization**

266 To investigate how *CDC20* mRNA is sequestered in the nucleus, we first tested the mechanisms proposed for known nuclear RNAs. It has been shown that mRNAs containing adenosine (A)-to-inosine (I) edited *Alu* inverted repeats are predominantly localized in the nucleus (Chen et al., 2008). A-to-I editing was responsible for the nuclear retention of *CTN-RNA* (Prasanth et al., 2005). We compared the sequences of *CDC20* full-length cDNA and genomic DNA but did not find any difference, ruling out A-to-I editing in *CDC20* mRNA. In addition, mRNA transcribed from *CDC20* cDNA, like the genomic DNA-derived mRNA, was also confined to the nucleus (Figure S8A), suggesting that *CDC20* nuclear sequestration can act upon the mature mRNA. These results indicate that the regulation of *CDC20* mRNA nuclear localization was distinct from other nuclear RNAs.

276 As the targeting signals of localized RNAs are usually encoded by their own sequences (Buxbaum et al., 2015), we next sought to identify the cis-acting element involved in *CDC20* mRNA nuclear localization. A series of deletions spanning the entire *CDC20* coding sequence, each 200 bp in length (except for  $\Delta$ 1207-1374) with 100 bp overlapping, were fused with *GFP* and expressed in wild-type plants under the control of the *CDC20* promoter (Figure 5A). The localization of these truncated *GFP-CDC20* chimeric RNAs was examined by RNA FISH. As cytoplasmic localization of *CDC20* mRNA can be observed at late mitosis when daughter cell nuclei reform (Figure 2D), we used *CYCB1;2* mRNA expression as an indicator of prophase cells. *CYCB1;2* showed similar expression in these transgenic plants compared to wild-type plants (Figure 5B), suggesting that expression of these exogenous RNAs did not interfere with

286 normal cell cycle progression. Examination of the subcellular distribution revealed that all  
287 these *GFP-CDC20* truncated RNAs were all localized inside the nucleus, surrounded by the  
288 cytoplasmic *CYCB1;2* mRNA (Figures 5B and S8B), indicating that deletion of a single  
289 fragment of *CDC20* coding region was not sufficient to disrupt RNA nuclear localization.

290 We next investigated the role of UTRs in *CDC20* mRNA nuclear sequestration. Chimeric  
291 mRNAs transcribed from *GFP* in-frame fused with *CDC20* genomic fragment without the  
292 5'UTR or 3'UTR (*pCDC20::GFP-CDC20 $\Delta$ 5'UTR* and *pCDC20::GFP-CDC20 $\Delta$ 3'UTR*) were  
293 analysed by RNA FISH. *CDC20* 3'UTR-truncated mRNAs showed the same nuclear  
294 localization pattern as full length *GFP-CDC20* transcript. By contrast, when the 5'UTR was  
295 deleted, nuclear localization was largely reduced. In most of the prophase cells, 5'UTR-  
296 truncated *GFP-CDC20* mRNAs were present either in both the nucleus and the cytoplasm, or  
297 mostly in the cytoplasm (Figures 5C, 5D and S8B), indicating that deletion of the 5'UTR  
298 abolished *CDC20* mRNA nuclear sequestration.

299

### 300 ***CDC20* 5'UTR Is Sufficient to Confer Nuclear Sequestration**

301 To further evaluate the function of the *CDC20* 5'UTR, we fused it to a *GFP* coding sequence  
302 (Figure 6A). This chimeric mRNA, *5'UTR<sup>CDC20</sup>-GFP*, as well as *GFP* alone, were expressed  
303 in wild-type plants under the control of the *CDC20* promoter. The number of prophase cells  
304 expressing these *GFP* mRNAs seem to be reduced compared to *GFP* fused with full length  
305 *CDC20* mRNA (Figure 6C), implying that the *CDC20* coding region contains cis-element  
306 contributing to transcriptional activity. Nevertheless, when expressed, *5'UTR<sup>CDC20</sup>-GFP*  
307 mRNA was found to be exclusively confined to the nucleus. The control, *GFP* mRNA alone,  
308 was distributed in the cytoplasm similar to *CYCB1;2* mRNA (Figures 6B and S8C). The results,  
309 taken together, demonstrate that the 5'UTR was both necessary and sufficient to sequester  
310 *CDC20* mRNA inside the nucleus.

311

### 312 ***CDC20* 5'UTR Is Required for Protein Translation**

313 The cytoplasmic localization of *GFP-CDC20 $\Delta$ 5'UTR* mRNA in prophase cells, if translated,  
314 would be expected to interfere with proper cell cycle progression. However, we did not observe  
315 any cellular defect in chromosome alignment or segregation, and the transgenic plants grew  
316 normally. Confocal microscopy analysis revealed that in *GFP-CDC20 $\Delta$ 3'UTR* meristems, the

317 fusion protein could be normally translated, showing clear GFP fluorescence in root and shoot  
318 apical meristem similar to the full length transcript (Figures 6D and 6E). However, no  
319 fluorescence could be observed in multiple independent *GFP-CDC20<sup>Δ5'UTR</sup>* transgenic lines,  
320 indicating that 5'UTR truncated *GFP-CDC20* mRNA cannot be properly translated. Taken  
321 together, these results demonstrate that the 5'UTR of *CDC20* plays dual roles in mRNA nuclear  
322 localization and translation.

323

## 324 Discussion

325 To ensure the fidelity of chromosome segregation, APC/C activity needs to be precisely  
326 modulated, especially at early mitosis when APC/C targets (e.g. CYCB proteins) are playing  
327 crucial roles. Emi1 has been implicated in animals as the inhibitor of APC/C by binding to  
328 CDC20, preventing its interaction with APC/C substrates at prophase (Reimann et al., 2001).  
329 However, the role of Emi1 remains contentious as it was also shown to have little effect on  
330 APC/C<sup>CDC20</sup> activity, and expression of a non-degradable version of Emi1 does not affect the  
331 destruction of cyclin A, cyclin B1 and securin (Di Fiore and Pines, 2007). Phosphorylation of  
332 APC/C subunits can facilitate CDC20 binding thus promoting APC/C activation (Sivakumar  
333 and Gorbsky, 2015). In mammalian cells APC/C phosphorylation is already initiated and  
334 CDC20 protein is also highly expressed at prophase (Kraft et al., 2003; Nilsson et al., 2008),  
335 which would presumably lead to APC/C activation. Therefore, it still remains obscure how  
336 APC/C activity is restrained during prophase. In plants, no Emi1 orthologue has been identified.  
337 GIG1/OSD1 and UVI4 have been suggested as the negative regulators of plant APC/C  
338 (Heyman et al., 2011; Iwata et al., 2011), but their direct effect on APC/C activity has not been  
339 determined. We found that in *Arabidopsis* dividing cells the mRNAs of *CDC20* and *CCS52B*  
340 are sequestered inside the nucleus. Nuclear retention of mRNAs is expected to block their  
341 accessibility to cytoplasmic ribosomes. Consistent with this scenario, neither CDC20 nor  
342 CCS52B proteins could be detected in prophase cells. As CDC20 and CCS52B are key  
343 activators of APC/C, it seems that absence of CDC20 and CCS52B proteins at prophase due to  
344 RNA nuclear sequestration would result in very low APC/C activity, thereby allowing cyclin  
345 B function (Figure S9).

346 Cellular mRNA localization has been proposed as a common mechanism to control local  
347 protein abundance. A systematic study revealed that 71% of expressed mRNAs in *Drosophila*  
348 embryos exhibit distinct cytoplasmic distribution patterns (Lécuyer et al., 2007). Compared to

349 the predominant distribution in the cytoplasm, nuclear localization of protein coding mRNAs  
350 has rarely been encountered. Our data demonstrate that properly processed, unedited mature  
351 mRNAs can be specifically sequestered inside the nucleus, correlating with control (absence)  
352 of protein synthesis. Nuclear sequestration of *CDC20* and *CCS52B* mRNA, despite their high  
353 levels, prevents protein translation, but on the other hand could also generate a store of RNA  
354 molecules that can be rapidly released to the cytoplasm upon NEBD for protein synthesis, thus  
355 to efficiently activate APC/C.

356 RNA localization is guided by specific cis-acting elements that are mostly identified in the  
357 3'UTR (Martin and Ephrussi, 2009). The localization signals contributing to the spatial  
358 distribution of *bicoid*, *nanos*, *xcat2*,  $\beta$ -actin mRNAs, and *histone* mRNAs have all been mapped  
359 to the 3'UTR (Iampietro et al., 2014; Martin and Ephrussi, 2009). However, deletion analysis  
360 revealed that the 3'UTR has no effect on *CDC20* mRNA nuclear localization. By contrast,  
361 when the 5'UTR is removed, the resulting *GFP-CDC20 $\Delta$ 5'UTR* chimeric mRNA is found to  
362 distribute into the cytoplasm. Furthermore, adding the *CDC20* 5'UTR was sufficient to  
363 sequester *GFP* mRNA in the nucleus, indicating that the 5'UTR is necessary and sufficient for  
364 *CDC20* mRNA nuclear sequestration. Despite being exported into the cytoplasm, the 5'UTR  
365 truncated *GFP-CDC20* RNA was not detectably translated, which is consistent with the  
366 important functions of 5'UTR in ribosome recruitment and translational initiation (Hinnebusch  
367 et al., 2016). Therefore, the dual roles of the 5'UTR in *CDC20* mRNA nuclear localization and  
368 translation provides a 'belt-and-braces' approach to avoid CDC20 protein synthesis and APC/C  
369 activation. RNA localization elements are recognized by trans-acting proteins. The RNA  
370 interactome capture method has been recently developed to identify *Xist* lncRNA binding  
371 proteins in human cells (Chu et al., 2015; McHugh et al., 2015; Minajigi et al., 2015). Applying  
372 this technology in plants to characterize *CDC20* and *CCS52B* mRNA interacting protein(s)  
373 would provide more insights into the understanding of mRNA localization, translational  
374 control, and cell cycle regulation.

375

## 376 **Materials and Methods**

### 377 **Plant material and growth conditions**

378 *Arabidopsis* Columbia ecotype (Col-0) was used as wild-type for the *in situ* hybridization  
379 analysis. The reporter lines GFP-MBD, H2B-RFP, CYCB1;1-GFP, and SUN2-GFP were  
380 described previously (Federici et al., 2012; Hamant et al., 2008; Oda and Fukuda, 2011; Reddy

381 et al., 2005). Seeds were germinated on Murashige and Skoog agar plates and 7 day-old  
382 seedlings were transferred to soil. Plants were grown under long day conditions (16 h/8 h  
383 light/dark period) at 20 °C.

384

### 385 **mRNA *In Situ* Hybridization**

#### 386 **RNA Probe Synthesis**

387 The cDNA fragments corresponding to each cell cycle gene were amplified with gene-specific  
388 primers (Table S4), ligated into the pGEM®-T Easy vector (Promega) and verified by  
389 sequencing. The plasmids containing the cDNA fragments were then used as templates for  
390 PCR with primers T7 and SP6. The PCR products were used as templates for in vitro  
391 transcription using the DIG RNA Labeling Kit (Roche). For fluorescence in situ probes,  
392 Fluorescein-12-UTP (Roche) was used instead of Digoxigenin-11-UTP (Roche).

#### 393 **Sample Preparation**

394 Shoot apices of *Arabidopsis* were harvested and fixed in FAA (3.7% formaldehyde, 5% acetic  
395 acid, 50% ethanol). The samples were embedded in wax and cut into 8- $\mu$ m sections. The  
396 sections were processed by dewaxing, rehydration and dehydration, as described in  
397 (<http://www.its.caltech.edu/~plantlab/protocols/insitu.pdf>).

#### 398 **Hybridization**

399 The sections were hybridized with gene-specific probes at 55 °C. After washing with SSC, the  
400 slices were incubated with anti-digoxigenin-AP antibody (Roche) for 2 hours at room  
401 temperature. The signals were detected by overnight colour reaction at 28 °C using NBT/BCIP  
402 (Roche). Sense-strand hybridizations, yielding no hybridization with target mRNA, are shown  
403 as controls. Images were taken using a Zeiss AxioImager M2 microscope fitted with a Zeiss  
404 AxioCam MRc colour camera and a PlanApochromat 20x/ 0.8 NA objective.

#### 405 **RNA Fluorescence *in situ* Hybridization (RNA FISH)**

406 Samples were processed as above for *in situ* hybridization, except that anti-fluorescein-POD  
407 (Roche) or anti-digoxigenin-POD (Roche) antibodies were used. After antibody incubation,  
408 the hybridization signals were detected using TSA Plus Fluorescein Fluorescence System  
409 (Perkin Elmer) for green signals or TSA Plus Cy5 Fluorescence System (Perkin Elmer) for red  
410 signals. DAPI staining was performed by mounting the slices with 1 $\mu$ g/ml DAPI shortly before  
411 observing the *in situ* hybridization signals. Images were taken with a Zeiss LSM700 confocal  
412 microscope equipped with a 20  $\times$  0.8NA dry objective. Laser excitation was 405 nm (DAPI),  
413 488 nm (Fluorescein) and 633 nm (Cy5).

## 414 **Double RNA FISH**

415 Double RNA FISH was used to check the mRNA expression of two genes in the same cells.  
416 Processed sections were hybridized with a mixture of two gene-specific probes, one labelled  
417 with digoxigenin and the other with fluorescein. The slices were incubated with anti-  
418 fluorescein-POD (Roche) and subsequently detected with TSA Plus Fluorescein Fluorescence  
419 System, giving green signals. After the first TSA reaction, 3% H<sub>2</sub>O<sub>2</sub> (Sigma) was applied to  
420 quench peroxidase activity (1 hour incubation in 3% H<sub>2</sub>O<sub>2</sub> was found to sufficiently quench all  
421 peroxidase activity of the first antibody). The slices were further incubated with anti-  
422 digoxigenin-POD antibody and detected by TSA Plus Cy5 Fluorescence System (Perkin  
423 Elmer), resulting in red signals.

## 424 **RNA FISH and Immunohistochemistry**

425 RNA FISH was carried out as described above. After TSA-Cy5 reaction to reveal the mRNA  
426 hybridization signals, the sections were washed in PBST (PBS containing 0.3% v/v Triton X-  
427 100), and then blocked in PBS-Blocking buffer (PBS containing 1.0% bovine serum albumin,  
428 0.2% powdered skim milk, and 0.3% Triton X-100) for 30 min at room temperature. The  
429 sections were then incubated with Alexa Fluor® 488 conjugated GFP antibody (1:100 dilution)  
430 (A-21311, Molecular Probes) overnight at 4 °C. The slides were washed in PBST for 3 times,  
431 5 min each and observed using a Zeiss LSM700 confocal microscope.

432

## 433 **Plasmid Construction and Plant Transformation**

### 434 **GFP Fusion with Full Length *CDC20* and *CCS52B* mRNA**

435 The MultiSite Gateway® Three-Fragment Vector Construction system (Invitrogen) was used  
436 to generate plasmid constructs. For *pCDC20.1::GFP-CDC20.1*, a 2,417 bp promoter upstream  
437 of *CDC20.1* ATG was amplified using genomic DNA as template with primers  
438 *CDC20\_promoter\_F* and *CDC20\_promoter\_R*. The PCR product was inserted into pDONR™  
439 P4-P1R by BP reaction, resulting in 1R4-pCDC20. The enhanced GFP (EGFP) coding  
440 sequence was amplified using primers *GFP\_gateway\_F* and *GFP\_gateway\_R*, and the product  
441 was inserted into pDONR™ 221 by BP reaction, resulting in 221-GFP. A 3,161bp genomic  
442 fragment containing the whole coding sequence of *CDC20.1* as well as 1,115bp 3' region was  
443 amplified with primers *CDC20\_DNA\_F* and *CDC20\_DNA\_R*, and the PCR product was  
444 inserted into pDONR™ P2R-P3, resulting in 2R3-gCDC20. The three entry constructs was  
445 incorporated into the binary vector pB7m34-GW by LR reaction. Similar strategy was applied  
446 to *CCS52B*. The primers used for *CCS52B* promoter were *CCS52B\_promoter\_F* and  
447 *CCS52B\_promoter\_R*; for coding region as well as 3' region were *CCS52B\_DNA\_F* and

448 CCS52B\_DNA\_R, and the constructs were named as 1R4-pCCS52B and 2R3-gCCS52B,  
449 respectively. *pCDC20.1::GFP-CDC20.1* and *pCCS52B::GFP-CCS52B* were transformed into  
450 *Arabidopsis* wild-type Col-0 as well as nuclear reporter line H2B-RFP (Col-0 background) via  
451 *Agrobacterium* mediated transformation.

452 To construct *CDC20* cDNA fused with *GFP*, the full length cDNA including 5' and 3' UTR  
453 was first amplified from meristem cDNA library using primers CDC20\_cDNA\_F and  
454 CDC20\_cDNA\_R. *GFP* was amplified with primers GFP\_F and GFP\_R. *CDC20* cDNA and  
455 *GFP* fragments were ligated into pBluescript SK(-), resulting in SK-GFP-cCDC20, which was  
456 then incorporated into pB7m34-GW with *CDC20* promoter and Nos terminator by LR reaction.

#### 457 ***CDC20* 5'UTR and 3'UTR Deletions**

458 For 5'UTR deletion analysis, *CDC20* promoter was amplified with primers  
459 CDC20\_promoter\_F and CDC20\_promoter\_NoUTR\_R. The PCR products were inserted into  
460 pDONR™ P4-P1R by BP reaction, resulting in 1R4-pCDC20\_No5'UTR. 1R4-pCDC20\_  
461 No5'UTR was further introduced into the binary vector pB7m34-GW with 221-GFP and 2R3-  
462 gCDC20 by LR reaction. For 3'UTR deletion analysis, *CDC20* genomic sequence without  
463 3'UTR was amplified with primers CDC20\_KpnI and CDC20\_SalI. *CDC20* terminator was  
464 amplified with primers CDC20\_SalI\_1 and CDC20\_BamHI. The two fragments were ligated  
465 into pBluescript SK(-), and the resulting plasmid was used as template for PCR with primers  
466 CDC20\_DNA\_F and CDC20\_DNA\_R. The PCR product was inserted into pDONR™ P2R-  
467 P3, resulting in 2R3-gCDC20\_NoUTR. 1R4-pCDC20, 221-GFP and 2R3-gCDC20\_NoUTR  
468 were ligated into pB7m34-GW by LR reaction.

#### 469 ***CDC20* Coding Sequence Deletions**

470 Fusion PCR was used to generate *CDC20* ORF deletion constructs. Two PCR fragments with  
471 25 bp overlapping were amplified with specific primers (Table S2). The PCR products were  
472 mixed and used as templates for a second round of PCR using primers GFP\_GW1\_F and GFP-  
473 CDC20\_GW1\_R. The product was inserted into pDONR™ 221 by BP reaction, and further  
474 incorporated into pB7m34-GW with *CDC20* promoter and Nos terminator by LR reaction.

475

#### 476 **Observation of Fluorescent Reporter Expression by Confocal Microscopy**

477 Shortly after bolting (stem length ~ 1 cm), the shoot apex was dissected and the fully developed  
478 flowers were carefully removed in order to expose the SAM. The meristem was then transferred  
479 to a square box containing fresh MS medium (Duchefa Biochemie - MS basal salt mixture)  
480 supplemented with vitamins (myoinositol 100 µg/ml, nicotinic acid 1 µg/ml, pyridoxine  
481 hydrochloride 1 µg/ml, thiamine hydrochloride 1 µg/ml, glycine 2 µg/ml) and 1% sucrose in

482 order to keep the meristem alive during observation. Viewed-stacks of SAMs were acquired  
483 with either a Zeiss LSM700 with 20 × NA 1.0 water dipping objective or a Leica SP8 with 25  
484 × NA 1.0 water dipping objective. 3D rendering was carried out using either Zen (Zeiss) or  
485 LAS X (Leica) confocal microscope software. The cell boundaries of the SAM were revealed  
486 by 0.1% propidium iodide (PI) staining for 5 min. Laser excitations were 488 nm (PI, GFP)  
487 and 555nm or 561nm (RFP). GFP fluorescence intensity was measured in Fiji ImageJ. To  
488 display the fluorescence intensity as shown in Figures 5 and S7, the fluorescence pictures were  
489 edited with the LUT editor plugin in Fiji ImageJ.

490 For MG132 treatment, dissected meristems were emerged in liquid MS medium containing  
491 DMSO (Mock) or 50 μM MG132 (C2211 Sigma) for 2 hours. For time lapse experiment,  
492 dissected meristems were kept in MS medium (Duchefa) supplemented with vitamins and  
493 sucrose. The meristems were kept in growth chamber under long day conditions (16 h/8 h  
494 light/dark period) at 20 °C, and were taken out for confocal imaging at each time point.

495

## 496 **Acknowledgments**

497 We would like to thank Jonathon Pines (The Institute of Cancer Research, London), David Ron  
498 (Cambridge Institute for Medical Research, University of Cambridge), Yrjö Helariutta and  
499 Henrik Jönsson (The Sainsbury Laboratory at Cambridge University), and Olivier Hamant  
500 (Plant Reproduction and Development Laboratory, INRA, ENS Lyon) for advice and insightful  
501 discussions. We also thank David E. Evans (Oxford Brookes University), Susan Armstrong  
502 (University of Birmingham), and Xinnian Dong (Duke University) for sharing seeds. We are  
503 grateful to Christoph Schuster for support with *in situ* hybridisation, Benoit Landrein for  
504 suggestions for confocal microscope analysis, Pawel Roszak for help with root sectioning,  
505 Alexis Peaucelle, Charles Melnyk, Paul Tarr, Pau Formosa Jordan and all members of the  
506 Meyerowitz Lab at the California Institute of Technology for helpful conversations. We  
507 appreciate Barbara Di Fiore and Anja Hagting (The Gurdon Institute, University of  
508 Cambridge), and Lisa Willis (The Sainsbury Laboratory at Cambridge University) for  
509 comments and careful reading of the manuscript. This work was funded by the Gatsby  
510 Charitable Trust (through fellowship GAT3395/DAA). E.M.M. is supported by the Howard  
511 Hughes Medical Institute and the Gordon and Betty Moore Foundation (through grant  
512 GBMF3406). R.W. and W.Y. are supported by the Leverhulme Trust (grant RPG-2015-285).

513

## 514 **References**



- 515 Bahar Halpern, K., Caspi, I., Lemze, D., Levy, M., Landen, S., Elinav, E., Ulitsky, I., and  
516 Itzkovitz, S. (2015). Nuclear Retention of mRNA in Mammalian Tissues. *Cell Rep.* *13*, 2653-  
517 2662.
- 518 Batista, P.J., and Chang, H.Y. (2013). Long noncoding RNAs: cellular address codes in  
519 development and disease. *Cell* *152*, 1298-1307.
- 520 Buxbaum, A.R., Haimovich, G., and Singer, R.H. (2015). In the right place at the right time:  
521 visualizing and understanding mRNA localization. *Nat. Rev. Mol. Cell Biol.* *16*, 95-109.
- 522 Cebolla, A., Vinardell, J.M., Kiss, E., Oláh, B., Roudier, F., Kondorosi, A, and Kondorosi, E.  
523 (1999). The mitotic inhibitor CCS52 is required for endoreduplication and ploidy-dependent  
524 cell enlargement in plants. *EMBO J.* *18*, 4476–4484.
- 525 Chen, L.L., DeCerbo, J.N., and Carmichael, G.G. (2008). Alu element-mediated gene silencing.  
526 *EMBO J.* *27*, 1694-1705.
- 527 Chu, C., Zhang, Q.C., da Rocha, S.T., Flynn, R.A., Bharadwaj, M., Calabrese, J.M., Magnuson,  
528 T., Heard, E., and Chang, H.Y. (2015). Systematic discovery of *Xist* RNA binding proteins.  
529 *Cell* *161*, 404-416.
- 530 Coudreuse, D., and Nurse, P. (2010). Driving the cell cycle with a minimal CDK control  
531 network. *Nature* *468*, 1074-1079.
- 532 de Almeida Engler, J., De Veylder, L., De Groodt, R., Rombauts, S., Boudolf, V., De Meyer,  
533 B., Hemerly, A., Ferreira, P., Beeckman, T., Karimi, M., et al. (2009). Systematic analysis of  
534 cell-cycle gene expression during *Arabidopsis* development. *Plant J.* *59*, 645–660.
- 535 De Veylder, L., Beeckman, T., and Inzé, D. (2007). The ins and outs of the plant cell cycle.  
536 *Nat. Rev. Mol. Cell Biol.* *8*, 655-665.
- 537 Dewitte, W., and Murray, J.A. (2003). The plant cell cycle. *Annu. Rev. Plant Biol.* *54*, 235-  
538 264.
- 539 Di Fiore, B. and Pines, J. (2007). Emi1 is needed to couple DNA replication with mitosis but  
540 does not regulate activation of the mitotic APC/C. *J. Cell Biol.* *177*, 425–437.
- 541 Engreitz, J.M., Ollikainen, N., and Guttman, M. (2016). Long non-coding RNAs: spatial  
542 amplifiers that control nuclear structure and gene expression. *Nat. Rev. Mol. Cell Biol.* *17*,  
543 756-770.

- 544 Fang, G., Yu, H., and Kirschner, M.W. (1998). Direct binding of CDC20 protein family  
545 members activates the anaphase-promoting complex in mitosis and G1. *Mol. Cell* 2, 163-171.
- 546 Frascini, R., Beretta, A., Sironi, L., Musacchio, A., Lucchini, G., and Piatti, S. (2001). Bub3  
547 interaction with Mad2, Mad3 and Cdc20 is mediated by WD40 repeats and does not require  
548 intact kinetochores. *EMBO J.* 20, 6648-6659.
- 549 Fobert, P.R., Coen, E.S., Murphy, G.J., and Doonan, J.H. (1994). Patterns of cell division  
550 revealed by transcriptional regulation of genes during the cell cycle in plants. *EMBO J.* 13,  
551 616-624.
- 552 Fujimitsu, K., Grimaldi, M., and Yamano, H. (2016). Cyclin-dependent kinase 1-dependent  
553 activation of APC/C ubiquitin ligase. *Science* 352, 1121-1124.
- 554 Gaillochot, C., and Lohmann, J.U. (2015). The never-ending story: from pluripotency to plant  
555 developmental plasticity. *Development* 142, 2237-2249.
- 556 Geisler, S., and Coller, J. (2013). RNA in unexpected places: long non-coding RNA functions  
557 in diverse cellular contexts. *Nat. Rev. Mol. Cell Biol.* 14, 699-712.
- 558 Ge, S., Skaar, J.R., and Pagano, M. (2009). APC/C- and Mad2-mediated degradation of Cdc20  
559 during spindle checkpoint activation. *Cell Cycle* 8, 167-171.
- 560 Hardwick, K.G., Johnston, R.C., Smith, D.L., and Murray, A.W. (2000). MAD3 encodes a  
561 novel component of the spindle checkpoint which interacts with Bub3p, Cdc20p, and Mad2p.  
562 *J. Cell Biol.* 148, 871-882.
- 563 Heidstra, R., and Sabatini, S. (2014). Plant and animal stem cells: similar yet different. *Nat.*  
564 *Rev. Mol. Cell Biol.* 15, 301-312.
- 565 Heyman, J., Van den Daele, H., De Wit, K., Boudolf, V., Berckmans, B., Verkest, A., Alvim  
566 Kamei, C.L., De Jaeger, G., Koncz, C., and De Veylder, L. (2011). *Arabidopsis*  
567 ULTRAVIOLET-B-INSENSITIVE4 maintains cell division activity by temporal inhibition of  
568 the anaphase-promoting complex/cyclosome. *Plant Cell* 23, 4394-4410.
- 569 Hinnebusch, A.G., Ivanov, I.P., and Sonenberg, N. (2016). Translational control by 5'-  
570 untranslated regions of eukaryotic mRNAs. *Science* 352, 1413-1416.

- 571 Iampietro, C., Bergalet, J., Wang, X., Cody, N.A., Chin, A., Lefebvre, F.A., Douziech, M.,  
572 Krause, H.M., and Lécuyer, E. Developmentally regulated elimination of damaged nuclei  
573 involves a Chk2-dependent mechanism of mRNA nuclear retention. *Dev. Cell* 29, 468-481.
- 574 Iwata, E., Ikeda, S., Matsunaga, S., Kurata, M., Yoshioka, Y., Criqui, M.C., Genschik, P., and  
575 Ito, M. (2011). GIGAS CELL1, a novel negative regulator of the anaphase-promoting  
576 complex/cyclosome, is required for proper mitotic progression and cell fate determination in  
577 *Arabidopsis*. *Plant Cell* 23, 4382-4393.
- 578 Izawa, D., and Pines, J. (2015). The mitotic checkpoint complex binds a second CDC20 to  
579 inhibit active APC/C. *Nature* 517, 631-634.
- 580 Köhler, A., and Hurt, E. (2007). Exporting RNA from the nucleus to the cytoplasm. *Nat. Rev.*  
581 *Mol. Cell Biol.* 8, 761-773.
- 582 Kraft, C., Herzog, F., Gieffers, C., Mechtler, K., Hagting, A., Pines, J., and Peters, J.M. (2003).  
583 Mitotic regulation of the human anaphase-promoting complex by phosphorylation. *EMBO J.*  
584 22, 6598-6609.
- 585 Kramer, E.R., Gieffers, C., Hölzl, G., Hengstschlager, M., and Peters, J.M. (1998). Activation  
586 of the human anaphase-promoting complex by proteins of the CDC20/Fizzy family. *Curr. Biol.*  
587 8, 1207-1210.
- 588 Lammens, T., Boudolf, V., Kheibarshekan, L., Zalmas, L.P., Gaamouche, T., Maes, S.,  
589 Vanstraelen, M., Kondorosi, E., La Thangue, N.B., Govaerts, W., et al (2008). Atypical E2F  
590 activity restrains APC/C<sup>CCS52A2</sup> function obligatory for endocycle onset. *Proc. Natl. Acad. Sci.*  
591 *USA* 105, 14721-14726.
- 592 Lander, A. D. (2011). Pattern, growth, and control. *Cell* 144, 955-969.
- 593 Lécuyer, E., Yoshida, H., Parthasarathy, N., Alm, C., Babak, T., Cerovina, T., Hughes, T.R.,  
594 Tomancak, P., and Krause, H.M. (2007). Global analysis of mRNA localization reveals a  
595 prominent role in organizing cellular architecture and function. *Cell* 131, 174-187.
- 596 McHugh, C.A., Chen, C.K., Chow, A., Surka, C.F., Tran, C., McDonel, P., Pandya-Jones, A.,  
597 Blanco, M., Burghard, C., Moradian, A., et al. (2015). The *Xist* lncRNA interacts directly with  
598 SHARP to silence transcription through HDAC3. *Nature* 521, 232-236.

- 599 Minajigi, A., Froberg, J.E., Wei, C., Sunwoo, H., Kesner, B., Colognori, D., Lessing, D., Payer,  
600 B., Boukhali, M., Haas, W., and Lee, J.T. (2015). A comprehensive Xist interactome reveals  
601 cohesin repulsion and an RNA-directed chromosome conformation. *Science* 349(6245).
- 602 Meyerowitz, E.M. (1997). Genetic control of cell division patterns in developing plants. *Cell*  
603 88, 299-308.
- 604 Lipshitz, H.D., and Smibert, C.A. (2000). Mechanisms of RNA localization and translational  
605 regulation. *Curr. Opin. Genet. Dev.* 10, 476-488.
- 606 Martin, K.C., and Ephrussi, A. (2009). mRNA localization: gene expression in the spatial  
607 dimension. *Cell* 136, 719-730.
- 608 Menges, M., de Jager, S.M., Gruissem, W., and Murray, J.A.H. (2005). Global analysis of the  
609 core cell cycle regulators of *Arabidopsis* identifies novel genes, reveals multiple and highly  
610 specific profiles of expression and provides a coherent model for plant cell cycle control. *Plant*  
611 *J.* 41, 546–566.
- 612 Nilsson, J., Yekezare, M., Minshull, J., and Pines, J. (2008). The APC/C maintains the spindle  
613 assembly checkpoint by targeting Cdc20 for destruction. *Nat. Cell Biol.* 10, 1411-1420.
- 614 Oda, Y., and Fukuda, H. (2011). Dynamics of *Arabidopsis* SUN proteins during mitosis and  
615 their involvement in nuclear shaping. *Plant J.* 66, 629-641.
- 616 Peters, J.M. (2006). The anaphase promoting complex/cyclosome: a machine designed to  
617 destroy. *Nat. Rev. Mol. Cell Biol.* 7, 644-656.
- 618 Pines, J. (2011). Cubism and the cell cycle: the many faces of the APC/C. *Nat. Rev. Mol. Cell*  
619 *Biol.* 12, 427-438.
- 620 Prasanth, K.V., Prasanth, S.G., Xuan, Z., Hearn, S., Freier, S.M., Bennett, C.F., Zhang, M.Q.,  
621 and Spector, D.L. (2005). Regulating gene expression through RNA nuclear retention. *Cell* 123,  
622 249-263.
- 623 Prinz, S., Hwang, E.S., Visintin, R., and Amon, A. (1998). The regulation of Cdc20 proteolysis  
624 reveals a role for APC components Cdc23 and Cdc27 during S phase and early mitosis. *Curr.*  
625 *Biol.* 8, 750-760.
- 626 Qiao, R., Weissmann, F., Yamaguchi, M., Brown, N.G., VanderLinden, R., Imre, R., Jarvis,  
627 M.A., Brunner, M.R., Davidson, I.F., Litos, G., et al. (2016). Mechanism of APC/C<sup>CDC20</sup>  
628 activation by mitotic phosphorylation. *Proc. Natl. Acad. Sci. USA.* 113, 2570-2578.

- 629 Reimann, J.D., Freed, E., Hsu, J.Y., Kramer, E.R., Peters, J.M., and Jackson, P.K. (2001). Emi1  
630 is a mitotic regulator that interacts with Cdc20 and inhibits the anaphase promoting complex.  
631 *Cell* *105*, 645–655.
- 632 Santos, S.D., Wollman, R., Meyer, T., and Ferrell, J. (2012). Spatial positive feedback at the  
633 onset of mitosis. *Cell* *149*, 1500-1513.
- 634 Sivakumar, S., and Gorbsky, G.J. (2015). Spatiotemporal regulation of the anaphase-promoting  
635 complex in mitosis. *Nat. Rev. Mol. Cell Biol.* *16*, 82-94.
- 636 Steeves, T.A., and Sussex, I.M. (1989). *Patterns in Plant Development* (New York: Cambridge  
637 University Press).
- 638 Sudakin, V., Chan, G.K., and Yen, T.J. (2001). Checkpoint inhibition of the APC/C in HeLa  
639 cells is mediated by a complex of BUBR1, BUB3, CDC20, and MAD2. *J. Cell Biol.* *154*, 925-  
640 936.
- 641 Tarayre, S., Vinardell, J.M., Cebolla, A., Kondorosi, A., and Kondorosi, E. (2004). Two classes  
642 of the CDh1-type activators of the anaphase-promoting complex in plants: novel functional  
643 domains and distinct regulation. *Plant Cell* *16*, 422–434.
- 644 Tsai, M.C., Manor, O., Wan, Y., Mosammamarast, N., Wang, J.K., Lan, F., Shi, Y., Segal, E.,  
645 and Chang, H.Y. (2010). Long noncoding RNA as modular scaffold of histone modification  
646 complexes. *Science* *329*, 689-693.
- 647 Vandepoele, K., Raes, J., De Veylder, L., Rouze, P., Rombauts, S., and Inzé, D. (2002).  
648 Genome-wide analysis of core cell cycle genes in *Arabidopsis*. *Plant Cell* *14*, 903–916.
- 649 Van Leene, J., Hollunder, J., Eeckhout, D., Persiau, G., Van De Slijke, E., Stals, H., Van  
650 Isterdael, G., Verkest, A., Neiryneck, S., Buffel, Y., et al. (2010). Targeted interactomics reveals  
651 a complex core cell cycle machinery in *Arabidopsis thaliana*. *Mol. Syst. Biol.* *6*, 397.
- 652 Varas, J., Graumann, K., Osman, K., Pradillo, M., Evans, D.E., Santos, J.L., and Armstrong,  
653 S.J. (2015). Absence of SUN1 and SUN2 proteins in *Arabidopsis thaliana* leads to a delay in  
654 meiotic progression and defects in synapsis and recombination. *Plant J.* *81*, 329–346.
- 655 Vanstraelen, M., Baloban, M., Da Ines, O., Cultrone, A., Lammens, T., Boudolf, V., Brown,  
656 S.C., De Veylder, L., Mergaert, P., and Kondorosi, E. (2009). APC/C-CCS52A complexes  
657 control meristem maintenance in the *Arabidopsis* root. *Proc. Natl. Acad. Sci. USA* *106*, 11806-  
658 11811.

659 Vernoux, T., Autran, D., and Traas J. (2000). Developmental control of cell division patterns  
660 in the shoot apex. *Plant Mol. Biol.* *43*, 569-581.

661 Wildwater, M., Campilho, A., Perez-Perez, J. M., Heidstra, R., Blilou, I., Korthout, H.,  
662 Chatterjee, J., Mariconti, L., Gruitsem, W. and Scheres, B. (2005). The *RETINOBLASTOMA-*  
663 *RELATED* gene regulates stem cell maintenance in *Arabidopsis* roots. *Cell* *123*, 1337-1349.

664 Yang, W., Schuster, C., Beahan, C.T., Charoensawan, V., Peaucelle, A., Bacic, A., Doblin,  
665 M.S., Wightman, R., and Meyerowitz, E.M. (2016). Regulation of Meristem Morphogenesis  
666 by Cell Wall Synthases in *Arabidopsis*. *Curr. Biol.* *26*, 1404-1415.

667 Yu, H. (2007). Cdc20: a WD40 activator for a cell cycle degradation machine. *Mol. Cell.* *27*,  
668 3-16.

669 Zhang, S., Chang, L., Alfieri, C., Zhang, Z., Yang, J., Maslen, S., Skehel, M., and Barford, D.  
670 (2016). Molecular mechanism of APC/C activation by mitotic phosphorylation. *Nature* *533*,  
671 260-264.

672

673

674

675

676

677

678

679

680

681

682

683

684

685

686 **Figures and Legends**

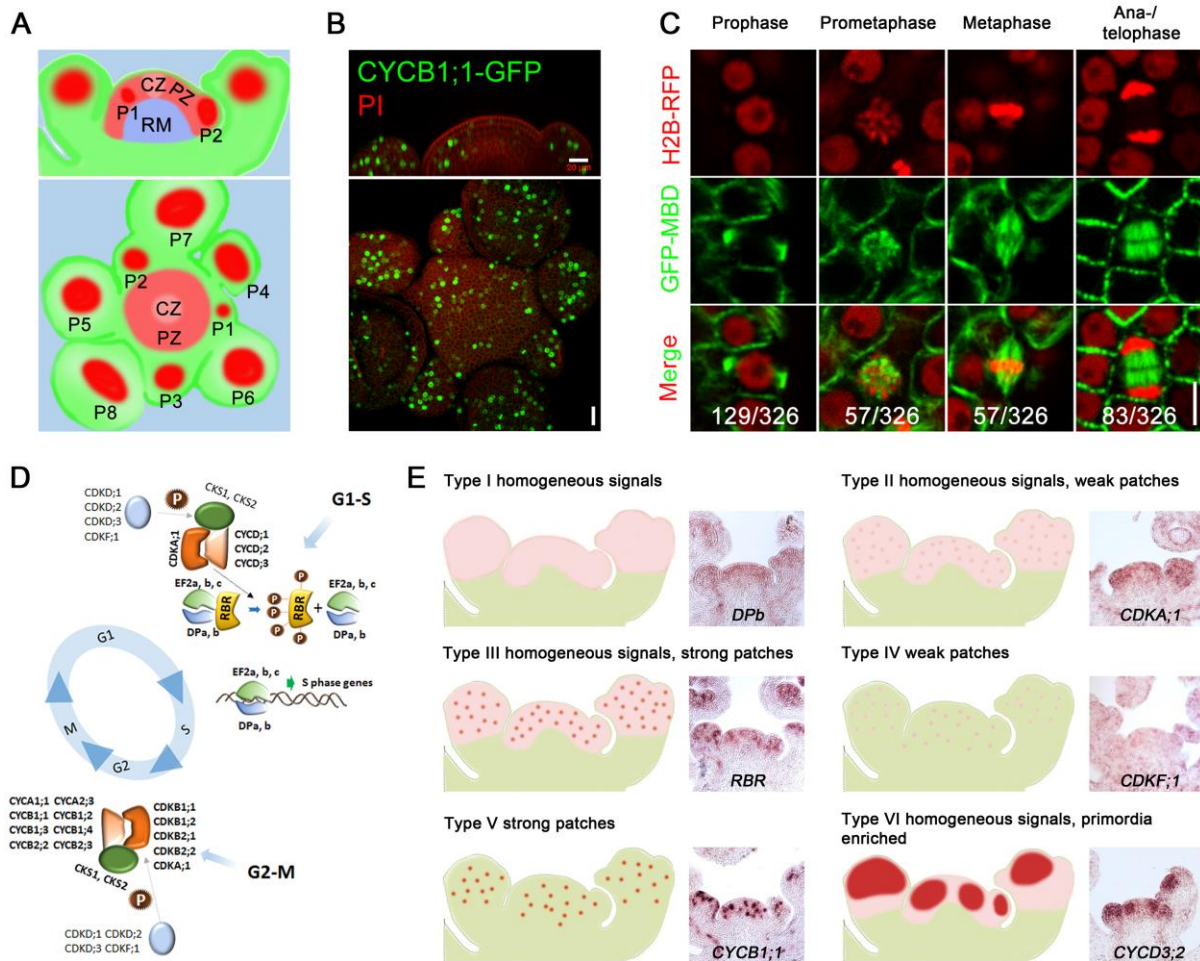

687

688 **Figure 1. Expression Patterns of Core Cell Cycle Genes in *Arabidopsis* Meristematic Cells.**

689 (A) A schematic representation showing the organization of the *Arabidopsis* inflorescence  
 690 shoot apical meristem (SAM). Upper panel, side view; lower panel, top view. CZ, central zone;  
 691 PZ, peripheral zone; RM, rib meristem; P, flower primordia, which form sequentially in the  
 692 PZ.

693 (B) CYCB1;1-GFP reporter expression in wild type (WT) SAM. Scale bar, 20  $\mu$ m.

694 (C) Expression of nuclear reporter H2B-RFP and microtubule reporter GFP-MBD in  
 695 meristematic cells corresponding to different cell cycle stages. From 6 WT SAMs, 326 cells  
 696 were observed to be undergoing division and the number of cells at each stage is shown. Scale  
 697 bar, 5  $\mu$ m.

698 (D) Functional modules of core cell cycle regulators in the *Arabidopsis* SAM.

699 (E) Classification of the mRNA distribution patterns of core cell cycle genes expressed in the  
 700 SAM. *In situ* hybridisation images for representative genes in each class are shown.

701

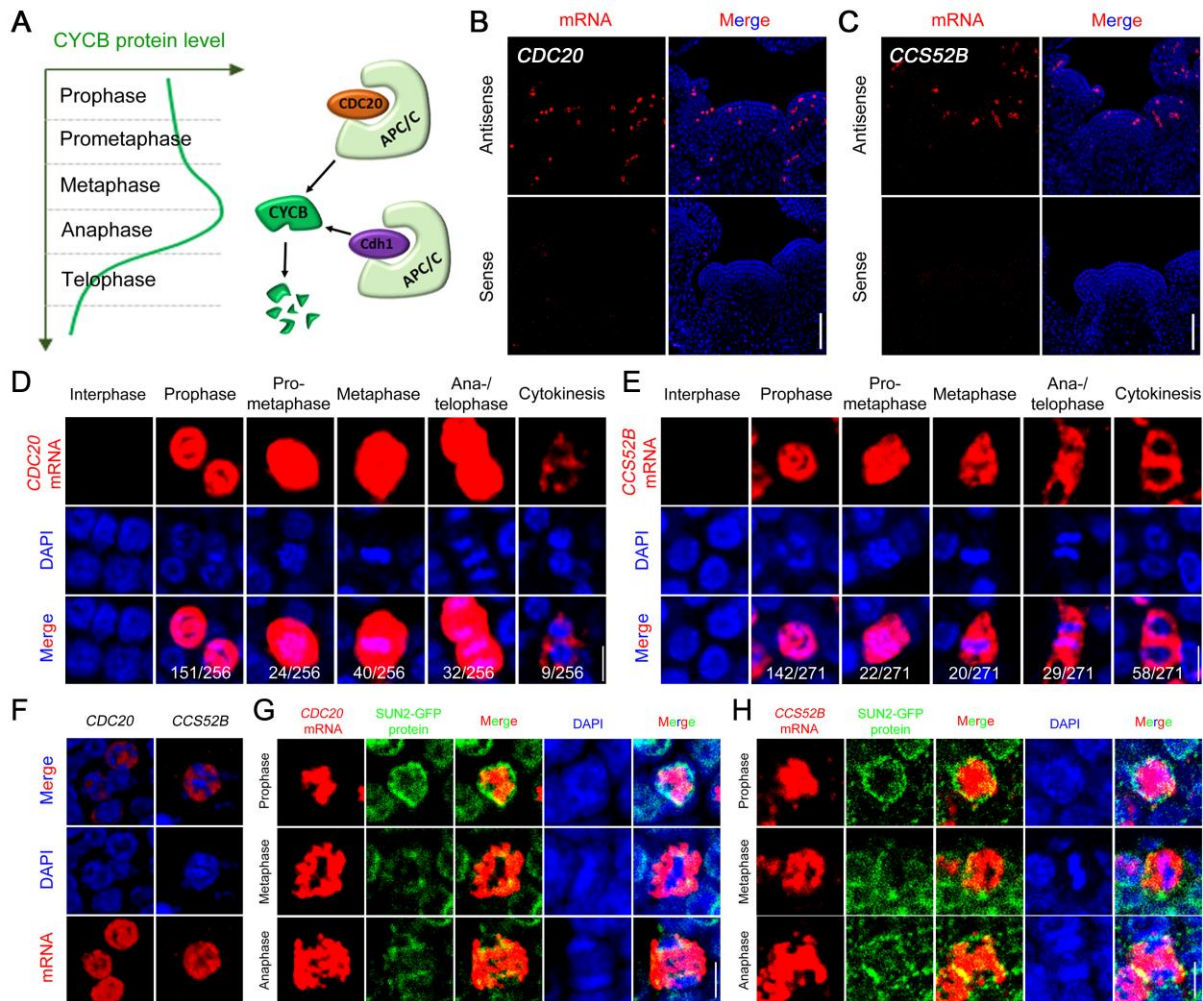

702

703 **Figure 2. Nuclear Sequestration of *CDC20* and *CCS52B* mRNAs in Prophase Cells.**

704 (A) A schematic model illustrating CYCB protein dynamics during mitosis and its degradation  
705 by APC/C<sup>CDC20</sup> and APC/C<sup>CDH1</sup> E3 ligases.

706 (B and C) RNA FISH to reveal the expression patterns of *CDC20* and *CCS52B* in the SAM.  
707 No signals were detected from the sense probes. Scale bars, 50  $\mu$ m.

708 (D and E) Expression of *CDC20* and *CCS52B* at different mitotic stages. Note the nuclear  
709 localization of *CDC20* and *CCS52B* mRNAs at prophase. Scale bars, 5  $\mu$ m.

710 (F) 3-D projection of *CDC20* and *CCS52B* mRNAs in prophase cells. Scale bar, 5  $\mu$ m.

711 (G and H) *CDC20* and *CCS52B* mRNA localization with nuclear envelope reporter at different  
712 stages of mitosis. The mRNAs were detected by FISH. The nuclear envelope was revealed  
713 using GFP antibody against a nuclear envelope reporter protein, SUN2-GFP. Scale bars, 5  $\mu$ m.  
714 All images, with the exception of (F), show single optical confocal sections.

715

716



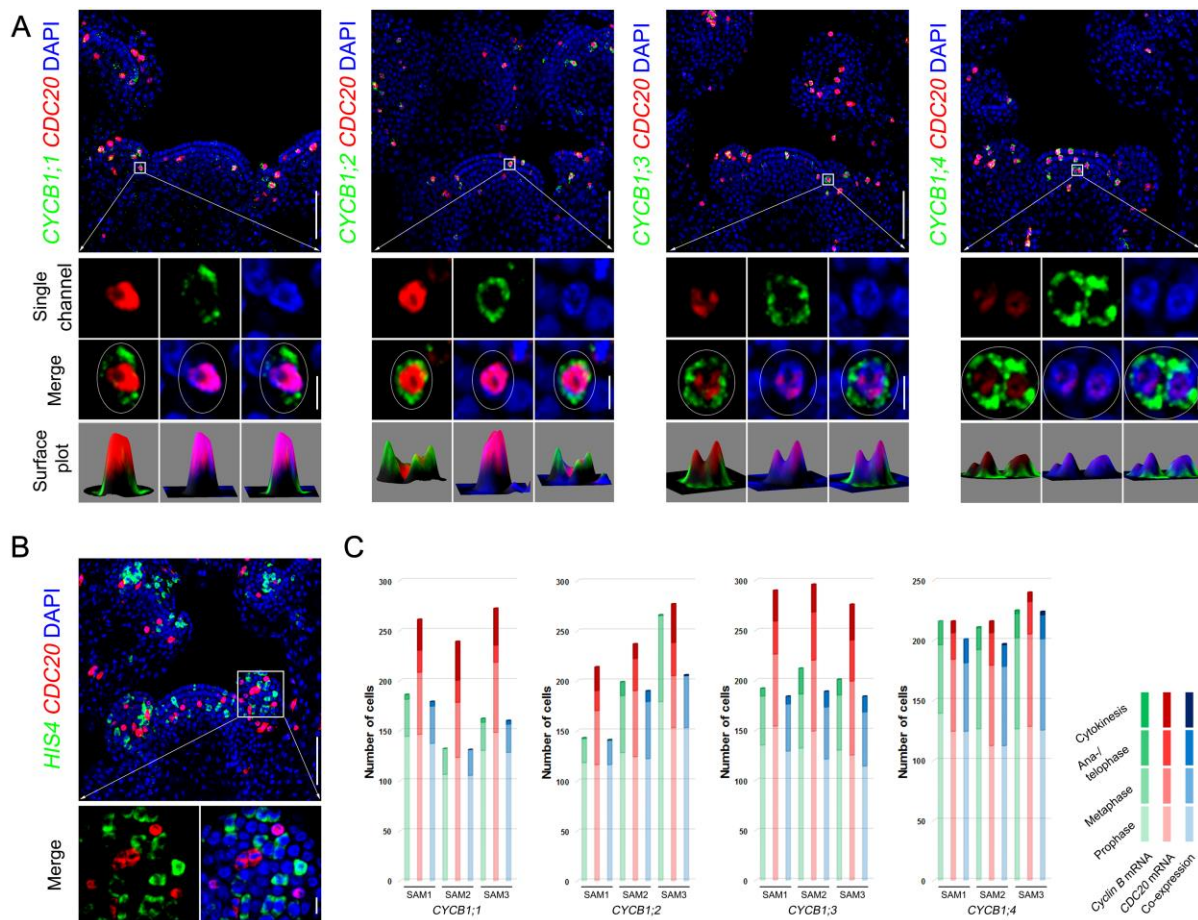

717

718 **Figure 3. Spatial Separation of *CDC20* and *CYCB* mRNAs in Prophase Cells.**

719 (A) Co-expression of *CDC20* with cell cycle genes as revealed by double RNA FISH coupled  
720 with DAPI staining.

721 (B) *CDC20* does not co-express with an S-phase expressed gene *HIS4*. *CDC20* and cell cycle  
722 genes were detected by gene specific probes with different labelling. Scale bars in (A) and (B),  
723 SAM overview (top panels) = 50  $\mu$ m; single cells (bottom panels) = 5  $\mu$ m.

724 (C) Quantification of the number of cells that express *CDC20* and *CYCB* genes at different  
725 mitotic stages. *CYCB1* genes were mostly expressed at prophase and metaphase, and largely  
726 co-express with *CDC20*.

727

728

729

730

731

732

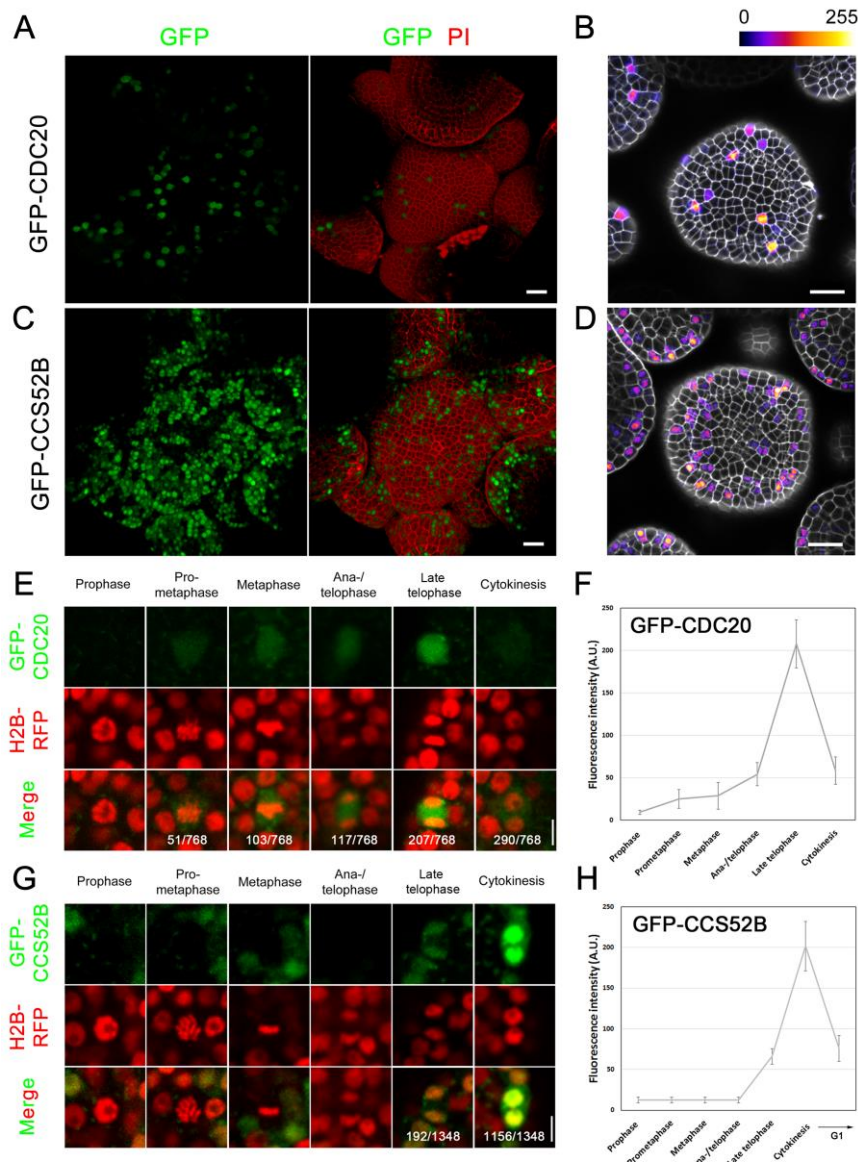

733

734 **Figure 4. Expression Patterns of CDC20 and CCS52B Proteins during the Cell Cycle.**

735 (A-D) GFP-CDC20 (A, B) and GFP-CCS52B (C, D) expression in the *Arabidopsis* SAM. The  
 736 cell wall was stained with propidium iodide (PI). Expression of GFP-CDC20 and GFP-  
 737 CCS52B in (B) and (D) were displayed using the Fire lookup table in ImageJ to show difference  
 738 in fluorescence intensity. Scale bars, 20  $\mu$ m.

739 (E-H) Protein dynamics of GFP-CDC20 (E) and GFP-CCS52B (G) at different stages of  
 740 mitosis. The fluorescence intensity was shown in (F) and (H). Scale bars, 5  $\mu$ m.

741

742

743

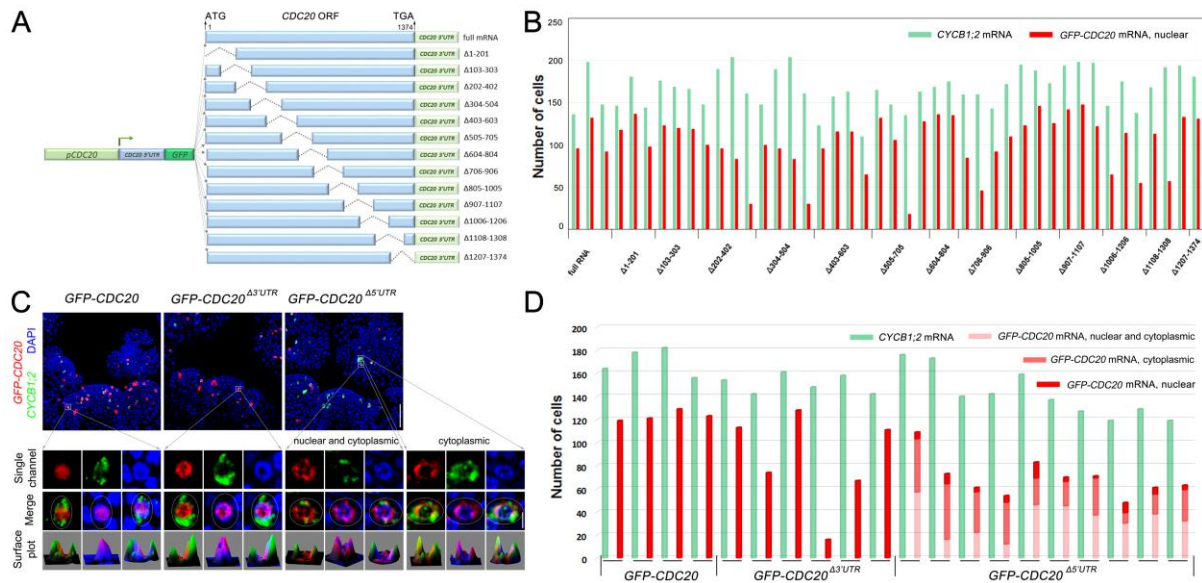

744

745 **Figure 5. *CDC20* 5'UTR Is Involved in mRNA Nuclear Localization.**

746 (A) Schematic diagram of *CDC20* mRNA deletion constructs.

747 (B) Quantification of the number of prophase cells expressing *GFP* fused *CDC20* mRNAs that  
 748 contain serial deletions. *CYCB1;2* expression was used as a prophase marker. All *GFP-CDC20*  
 749 mRNAs with deletions in the *CDC20* ORF were found to localize in the nucleus. Each pair of  
 750 columns represents data from one meristem.

751 (C) Localization of *GFP-CDC20* truncated mRNAs lacking *CDC20* 5'UTR or 3'UTR.  
 752 Deletion of 5'UTR abolished *GFP-CDC20* mRNA nuclear sequestration, leading to  
 753 nucleocytoplasmic or mostly cytoplasmic localization. Scale bars, 50  $\mu$ m for SAM overview  
 754 (top panels) and 5  $\mu$ m for single cells (bottom panels).

755 (D) Quantification of the number of prophase cells expressing full length, 3'UTR deleted, and  
 756 5'UTR deleted *GFP-CDC20* mRNAs. Each pair of columns represents data from one meristem.

757

758

759

760

761

762

763

764

765

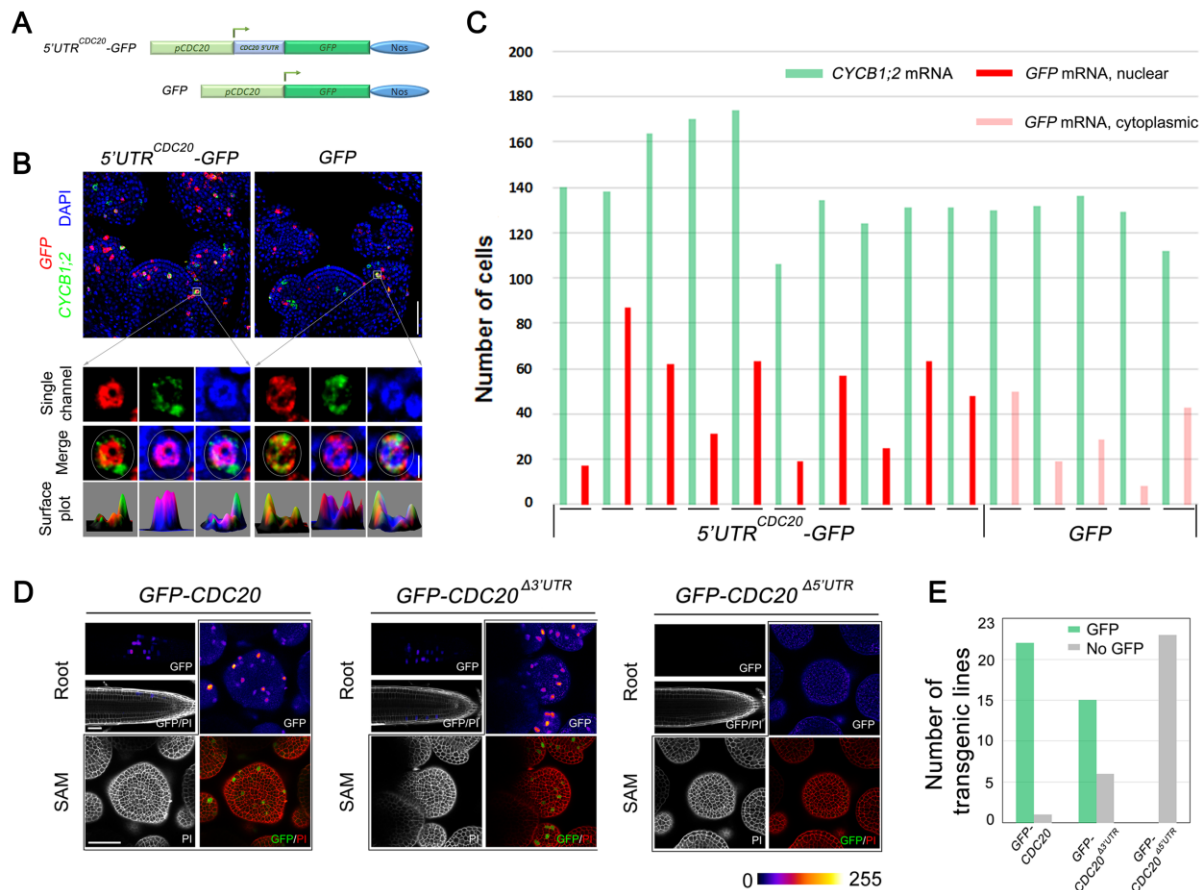

766

767 **Figure 6. Dual Roles of 5'UTR in *CDC20* mRNA Nuclear Localization and Translation.**

768 (A) Schematic diagram of chimeric mRNA construction in which *GFP* was fused with *CDC20*  
 769 5'UTR. *GFP* alone was used a control.

770 (B) Localization of  $5'UTR^{CDC20}-GFP$  and *GFP* mRNAs in prophase cells. Scale bars, 50  $\mu$ m  
 771 for SAM overview (top panels) and 5  $\mu$ m for single cells (bottom panels).

772 (C) Quantification of the number of prophase cells expressing  $5'UTR^{CDC20}-GFP$  and *GFP*  
 773 mRNAs. Each pair of columns represents cell numbers from one meristem.

774 (D) The expression of GFP-*CDC20* fusion protein in root and SAM as revealed. No GFP  
 775 fluorescence could be observed in 5'UTR truncated *GFP-CDC20* transgenic plants. Scale bar,  
 776 50  $\mu$ m.

777 (E) The number of transgenic lines analysed. GFP-*CDC20* expression was detected in 22/23  
 778 lines of full length *GFP-CDC20* plants, 15/21 lines of 3'UTR truncated *GFP-CDC20*  
 779 transgenic plants, and 0/23 of 5'UTR truncated *GFP-CDC20* transgenic plants.

780

781

782

783

784 **Supplemental Figures**

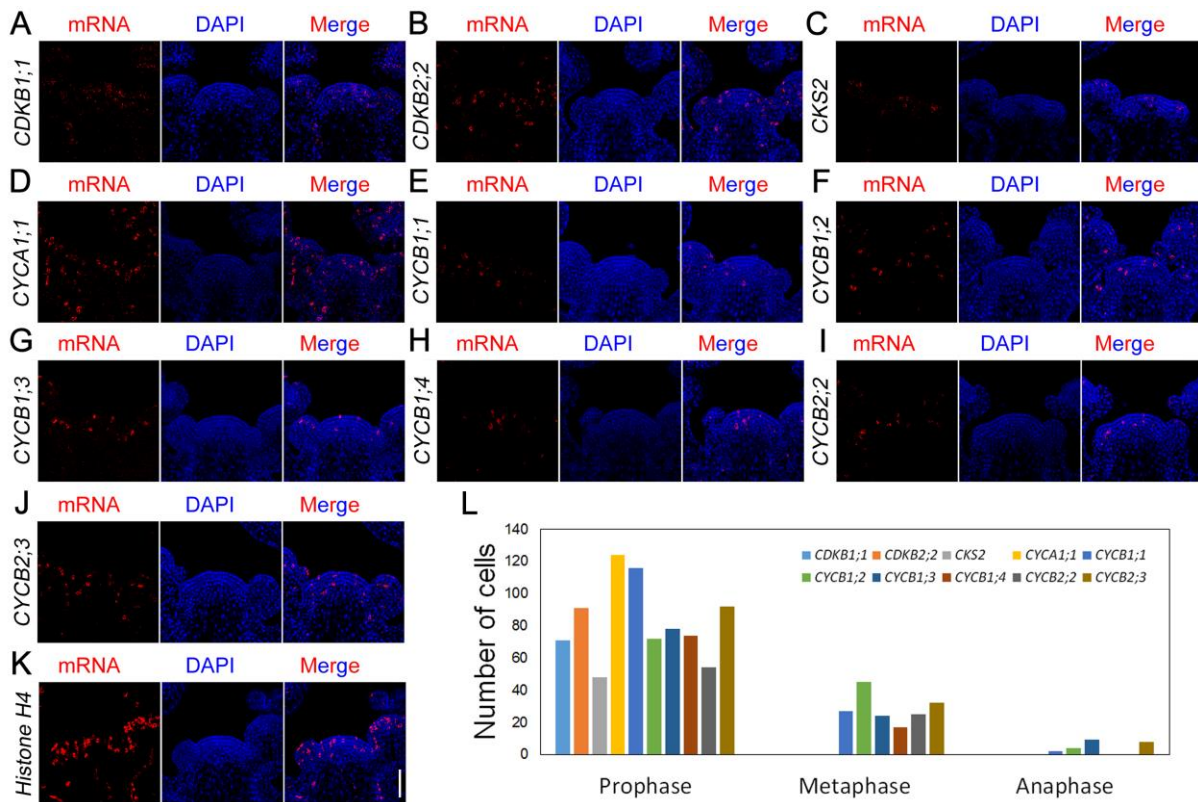

785

786 **Figure S1. Mitosis Specific Expression of Cell Cycle Genes in the SAM.**

787 The mRNAs were detected by DIG labelled probes, which were further recognized by POD-  
 788 labelled anti-DIG antibody coupled with the TSA-CY5 detection system. The nucleus was  
 789 stained with DAPI.

790 (A-K) Expression patterns of G2/M cell cycle genes. Scale bar, 50  $\mu$ m.

791 (L) Quantification of the number of cells expressing cell cycle genes at different mitotic stages.

792

793

794

795

796

797

798

799

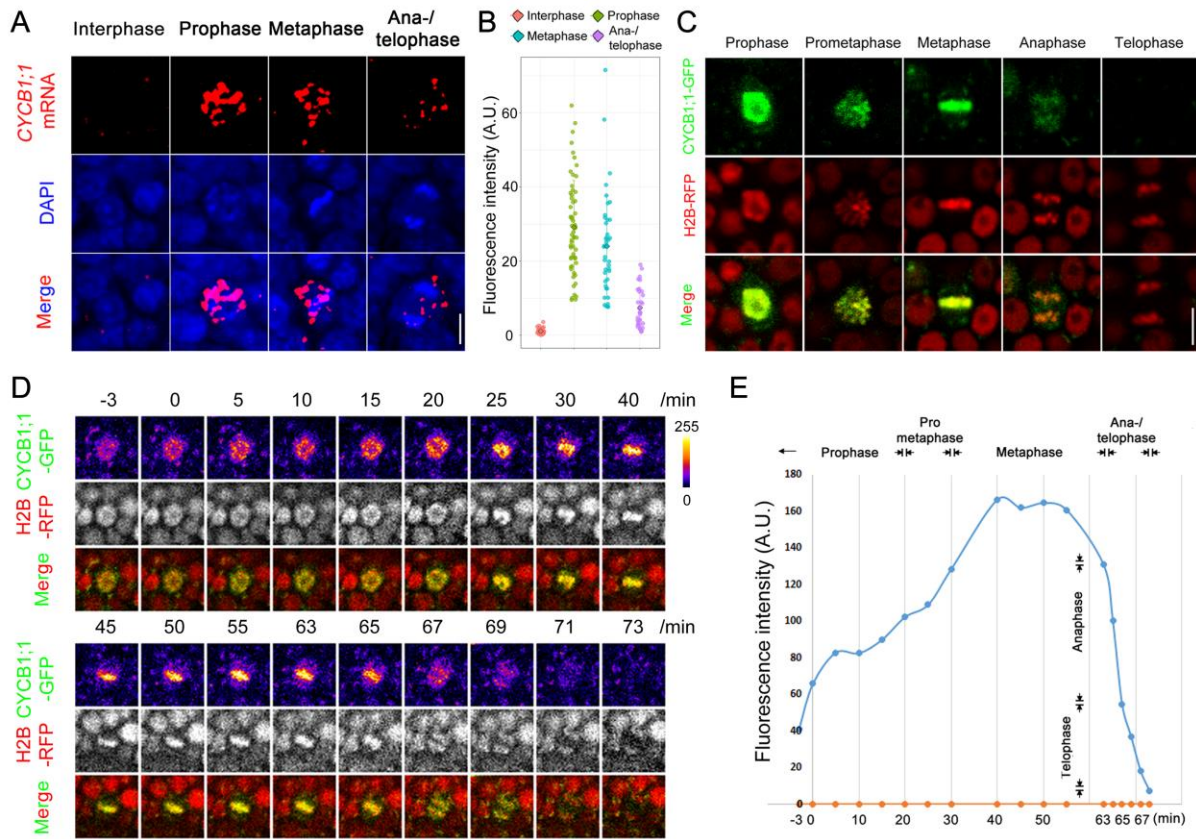

800

801 **Figure S2. Rapid CYCB1;1 Protein Degradation at Metaphase-to-Anaphase Transition.**

802 (A) RNA FISH to show the accumulation of *CYCB1;1* transcripts at different stages of mitosis.  
 803 Scale bar, 5  $\mu$ m.

804 (B) *CYCB1;1* mRNA levels at different stages of mitosis, as calculated from the fluorescence  
 805 intensity of RNA FISH images.

806 (C) CYCB1;1-GFP protein expression at different stages of the cell cycle. H2B-RFP is used to  
 807 monitor chromosome alignment and segregation. Scale bar, 5  $\mu$ m.

808 (D and E) Protein dynamics of CYCB1;1-GFP during mitosis. GFP fluorescence intensity is  
 809 shown in (E).

810

811

812

813

814

815

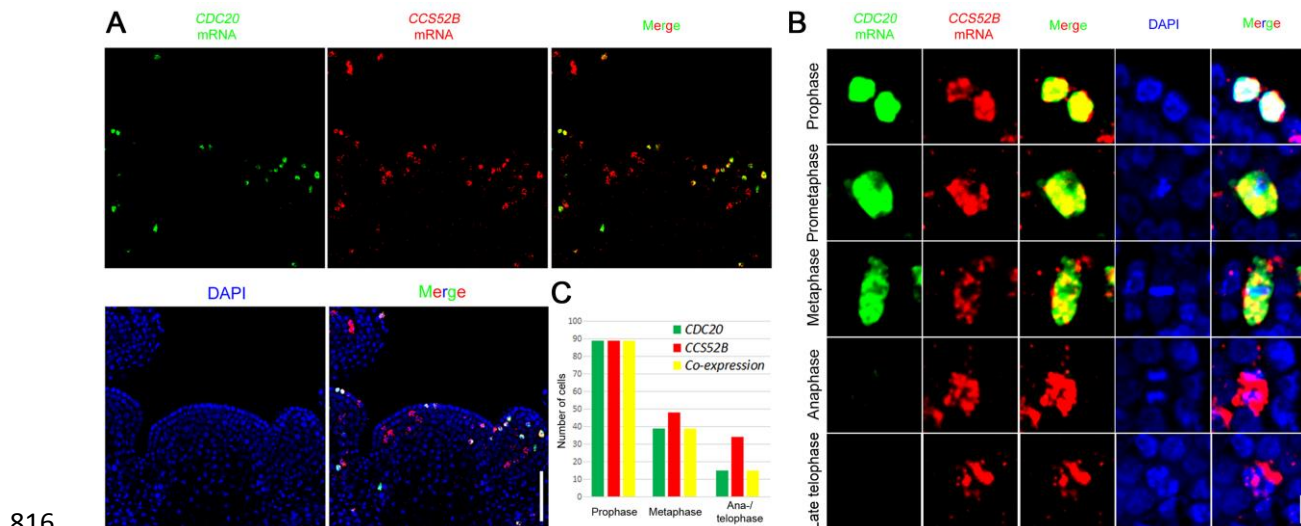

816

817 **Figure S3. Co-expression Analysis of *CDC20* and *CCS52B*.**

818 (A) Double RNA FISH to show the expression patterns of *CDC20* and *CCS52B* in the same  
819 meristem. Scale bar, 50  $\mu$ m.

820 (B) Co-expression of *CDC20* and *CCS52B* at different mitotic stages. The anaphase and late  
821 telophase cells shown are those only expressing *CCS52B*. Scale bar, 5  $\mu$ m.

822 (C) Quantification of the number of cells that express *CDC20* and *CCS52B*.

823

824

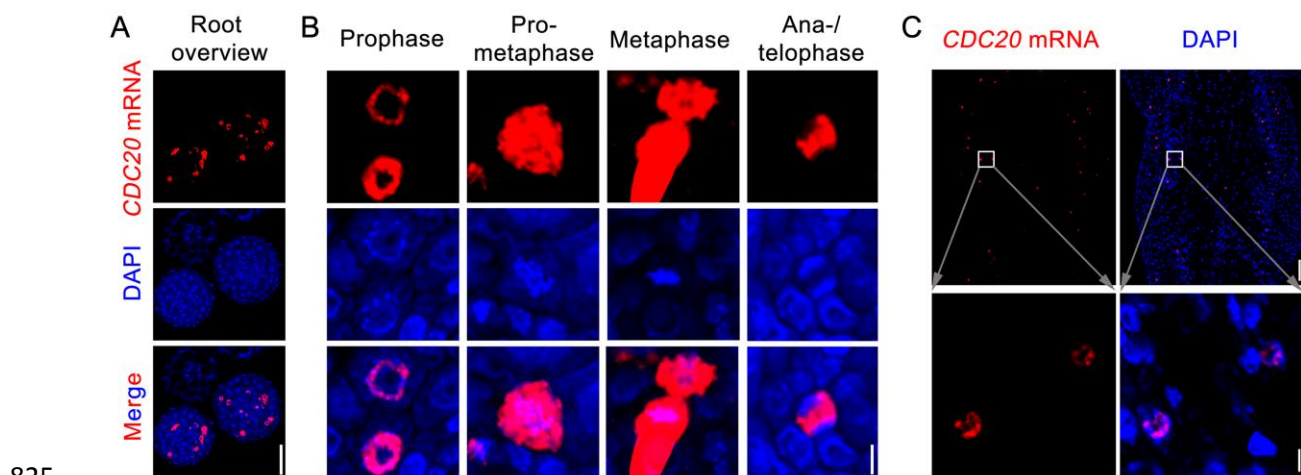

825

826 **Figure S4. Expression Pattern of *CDC20* in Root and Shoot Dividing Cells.**

827 (A) Root overview. Scale bar, 50  $\mu$ m.

828 (B) Root cells at different stages of mitosis. Note that *CDC20* mRNA is sequestered inside the  
829 nucleus at prophase. Scale bar, 5  $\mu$ m.

830 (C) Nuclear localization of *CDC20* mRNA in shoot prophase cells. Scale bars, 50  $\mu$ m for shoot  
831 overview (top panels) and 5  $\mu$ m for cells (bottom panels).

832

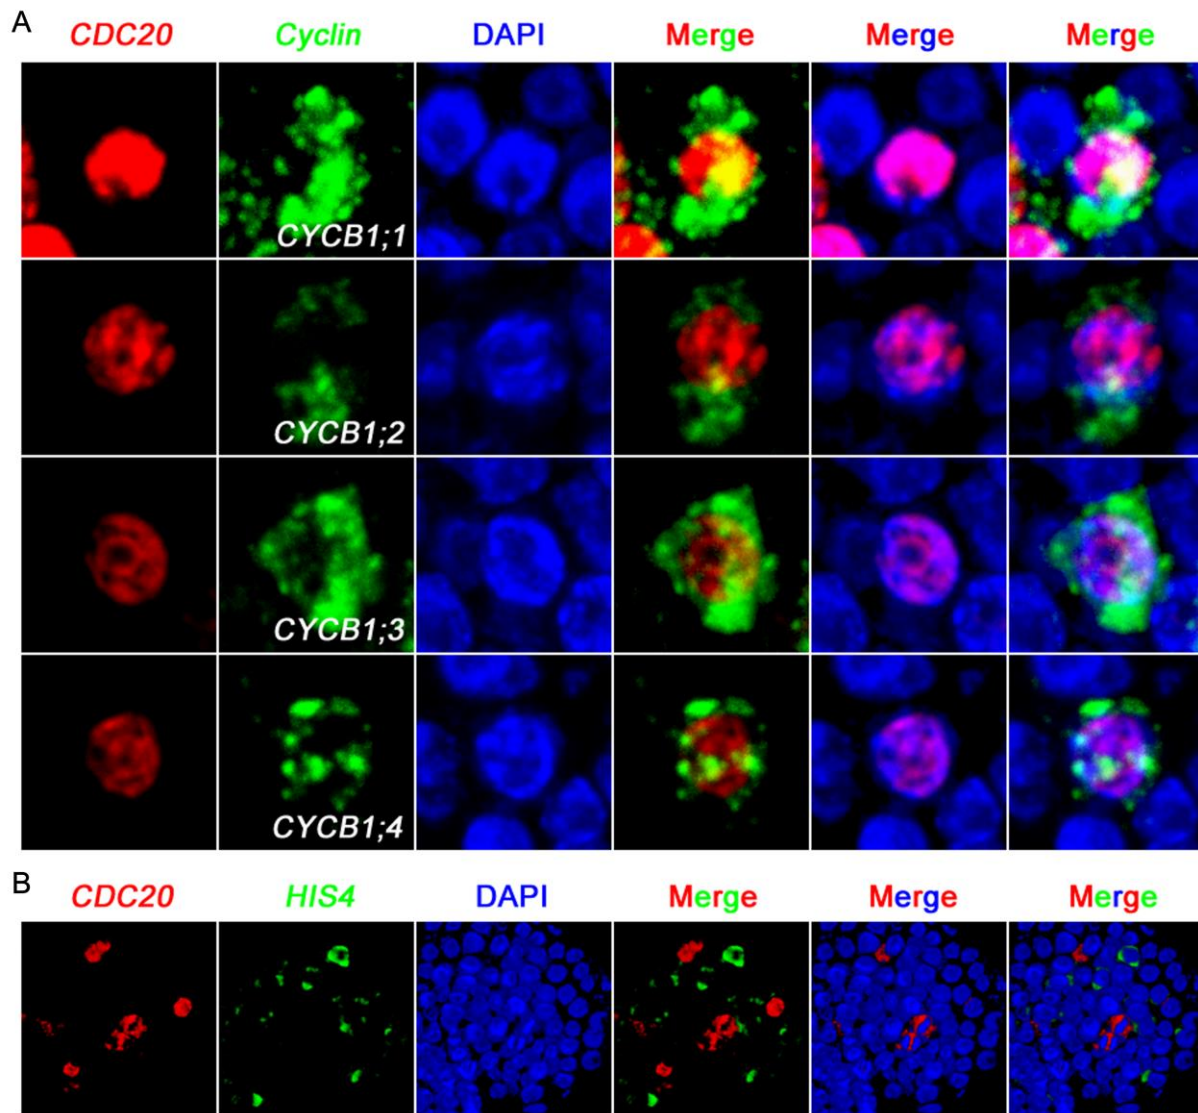

833

834 **Figure S5. 3-D Projection of Confocal Images to Show *CDC20* Expression Patterns with**  
835 ***CYCBs* and *HIS4* in the Same Meristems.**

836 (A) Nucleocytoplasmic separation of *CDC20* and *CYCB1* transcripts in prophase cells.

837 (B) *CDC20* does not co-express with S-phase marker *HIS4* gene.

838

839

840

841

842

843

844



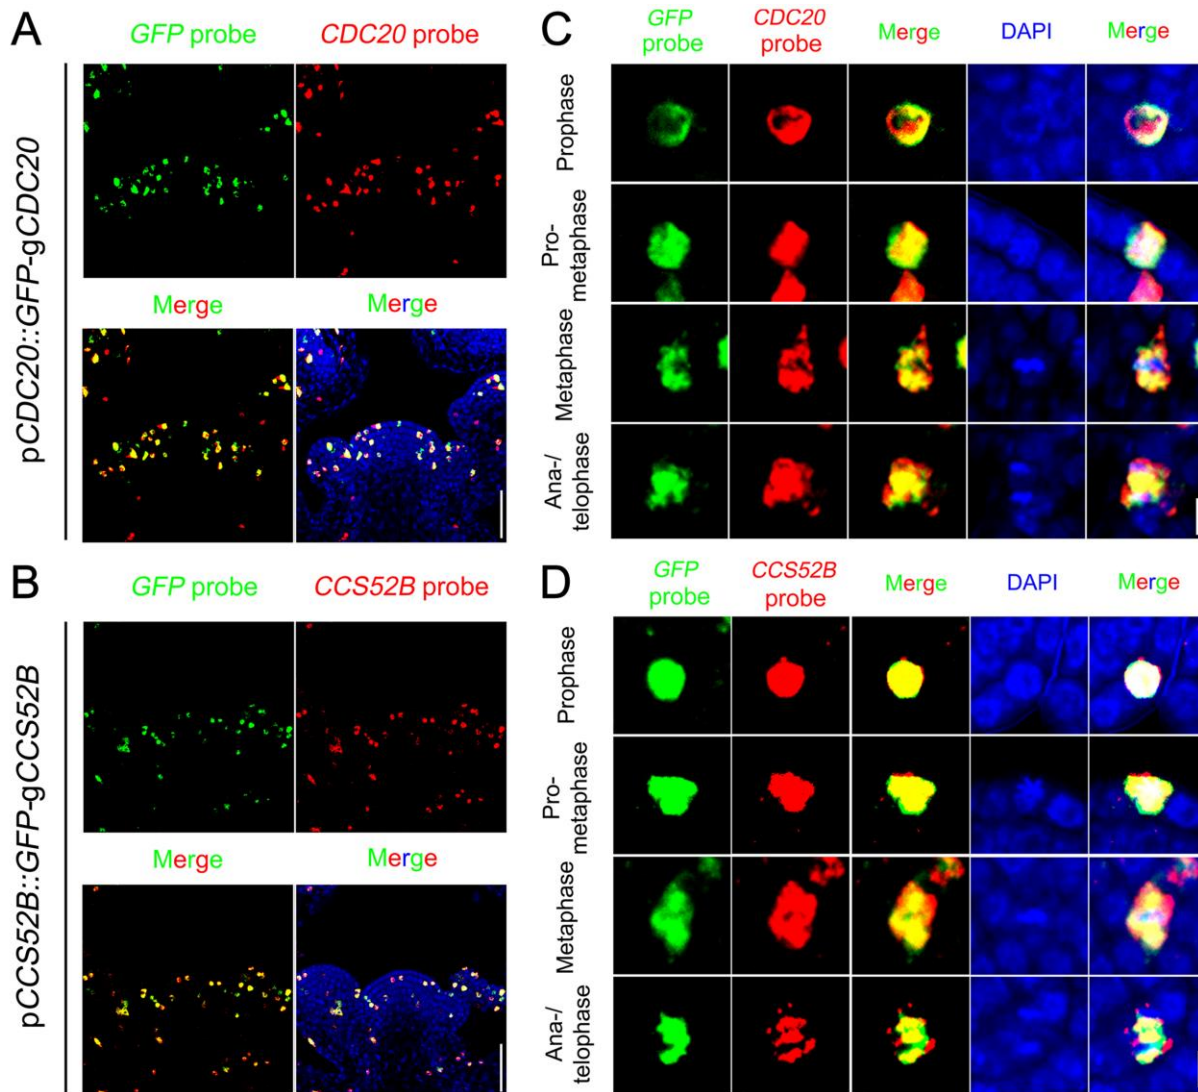

846 **Figure S6. Fusion of *GFP* does not Affect *CDC20* or *CCS52B* mRNA Nuclear Localization.**

847 (A and B) Overview of *GFP* mRNA distribution with *CDC20* and *CCS52B* in *pCDC20::GFP-*  
848 *CDC20* (A) and *pCCS52B::GFP-CCS52B* (B) transgenic plants. Scale bars, 50  $\mu$ m.

849 (C and D) Co-localization of *GFP* mRNA with *CDC20* (C) or *CCS52B* (D) mRNA in mitotic  
850 cells. Scale bars, 5  $\mu$ m.

851

852

853

854

855

856

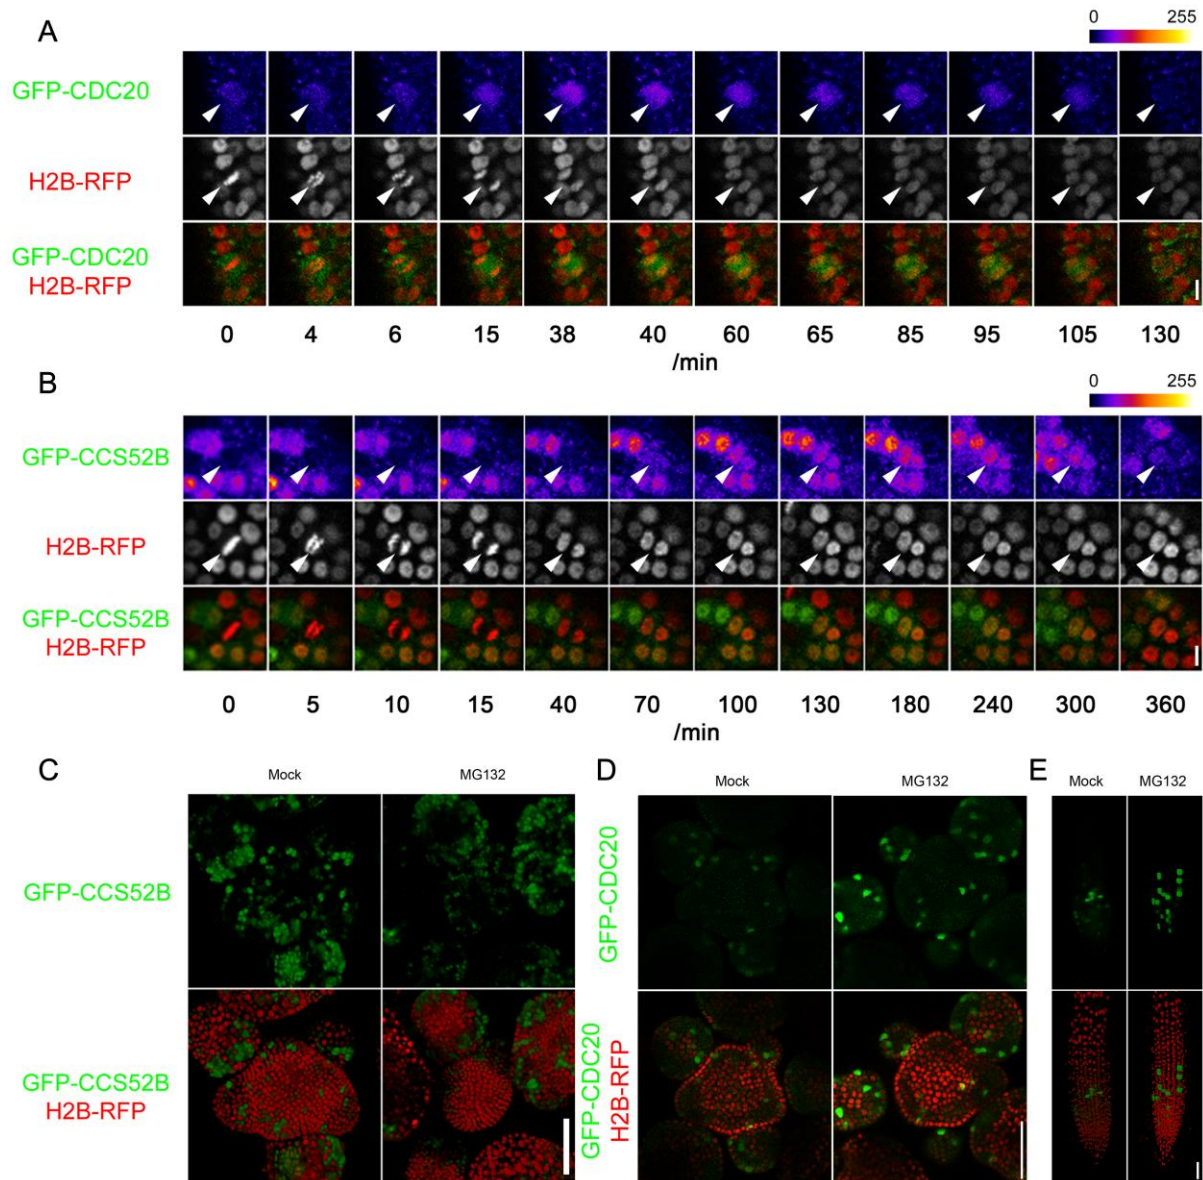

857

858 **Figure S7. Fluctuation in the Protein Levels of CDC20 and CCS52B during the Cell Cycle.**

859 (A and B) Time-lapse imaging of GFP-CDC20 and GFP-CCS52B protein expression in the  
860 same cell as it undergoes division. Arrowheads indicate the cells analysed. Scale bars, 5  $\mu$ m.

861 (C) MG132 treatment does not affect GFP-CCS52B protein abundance. Scale bar, 50  $\mu$ m.

862 (D and E) The amount of GFP-CDC20 proteins in both SAM (C) and root (D) can be increased  
863 by MG132 treatment. Scale bar, 50  $\mu$ m.

864

865

866

867

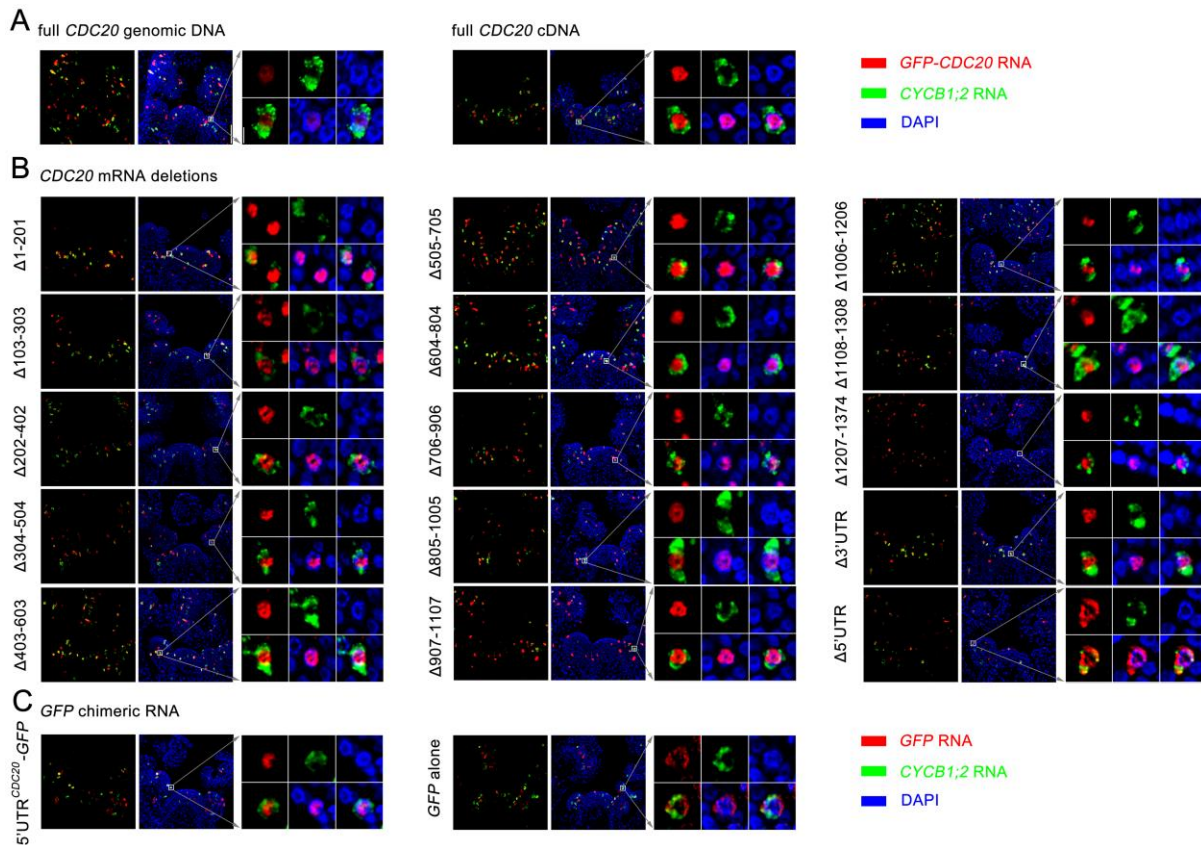

868

869 **Figure S8. 5'UTR Affects *CDC20* mRNA Nuclear Localization.**

870 (A) The expression patterns of full length *GFP-CDC20* mRNAs transcribed from genomic  
 871 DNA or cDNA in the shoot apex. Shown are representative meristems from one of the  
 872 independent transgenic lines. Scale bar, 50  $\mu$ m for SAM overview and 5  $\mu$ m for single cells.

873 (B) The expression patterns of *GFP-CDC20* truncated mRNAs.

874 (C) The expression patterns of *GFP* chimeric mRNAs.

875

876

877

878

879

880

881

882

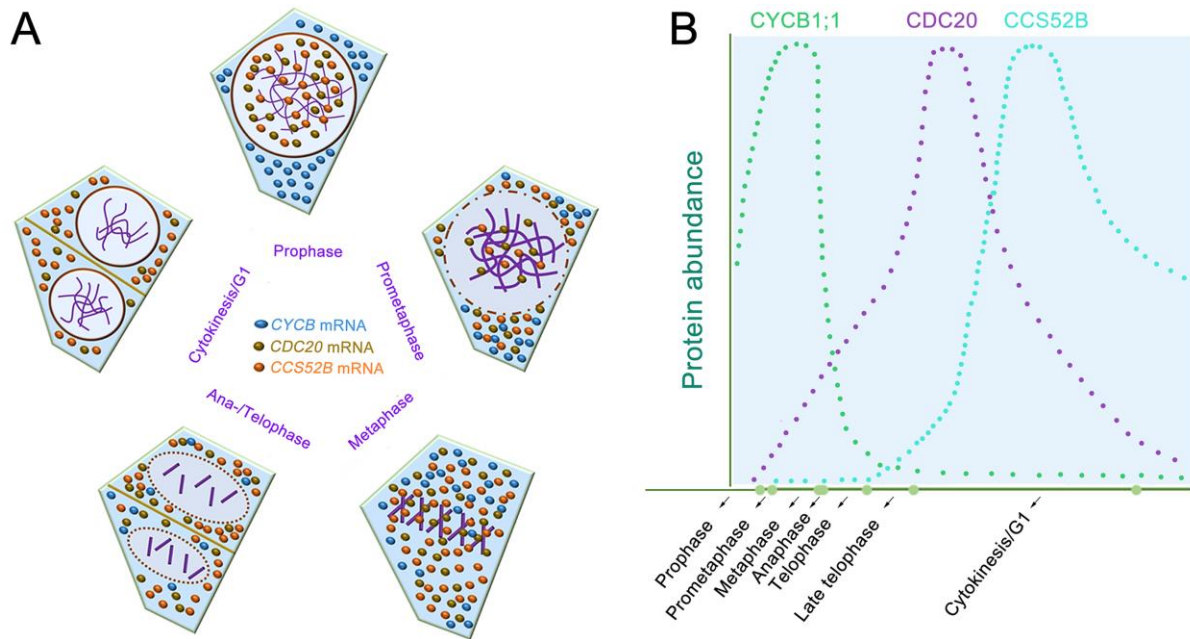

883

884 **Figure S9. Model for Cell Cycle Control by mRNA Nuclear Sequestration.**

885 (A) Subcellular distribution of *CYCB*, *CDC20* and *CCS52B* mRNAs during cell cycle  
886 progression in plant stem cells.

887 (B) *CYCB*, *CDC20* and *CCS52B* protein dynamics. Nuclear sequestration of *CDC20* and  
888 *CCS52B* mRNAs in prophase prevents their translation to protein. Nuclear envelope  
889 breakdown at prometaphase enables redistribution of the mRNAs into the cytoplasm and  
890 subsequent protein synthesis, following which the proteins activate APC/C to destroy cyclin B  
891 proteins and other substrates.
